# Supplementary material
Source: MDPI journal article supplement (https://www.mdpi.com/2221-3759/7/1/1)
Supplement: s1 [file s1]

# Supplementary materials

The following strains were used in this study:

| Strain       | Genotype                                                                                                                                                                                                |
|--------------|---------------------------------------------------------------------------------------------------------------------------------------------------------------------------------------------------------|
| N2 (Bristol) | <i>C. elegans</i> wild-type                                                                                                                                                                             |
| CB1370       | <i>daf-2(e1370)</i> III                                                                                                                                                                                 |
| JR667        | <i>unc-119(e2498::Tc1)</i> III; <i>wIs51[pMF1(scmp::gfp) + pDP#MM016b(unc-119p::unc-119(+))]</i> V                                                                                                      |
| PD4666       | <i>ayIs6[pBH47(hlh-8p::gfp) + dpy-20(+)]</i> X                                                                                                                                                          |
| EG8081       | <i>unc-119(ed3)</i> III; <i>oxTi177[ttTi5605 + NeoR(+)]</i> IV                                                                                                                                          |
| FR1382       | <i>ttTi4348 I</i> ; <i>unc-119(ed3)</i> III                                                                                                                                                             |
| FR843        | <i>let-418(n3536)</i> V                                                                                                                                                                                 |
| FR1007       | <i>daf-2(e1370)</i> III; <i>let-418(n3536)</i> V                                                                                                                                                        |
| FR1209       | <i>ayIs6[pBH47(hlh-8p::gfp) + dpy-20(+)]</i> X; <i>let-418(n3536)</i> V                                                                                                                                 |
| FR1353       | <i>Si3[let-418p::let-418ORF::3xFLAG::let-418 3'UTR + cb-unc-119(+)]</i> II; <i>unc-119(ed3)</i> III                                                                                                     |
| FR1355       | <i>Si3[let-418p::let-418ORF::3xFLAG::let-418 3'UTR + cb-unc-119(+)]</i> II; <i>unc-119(ed3)</i> III (?); <i>let-418(n3536)</i> V                                                                        |
| FR1389       | <i>Si10[pie-1p::let-418ORF::3xFLAG::let-418 3'UTR + cb-unc-119(+)]</i> I; <i>unc-119(ed3)</i> III                                                                                                       |
| FR1392       | <i>Si11[dpy-7p::let-418ORF::3xFLAG::let-418 3'UTR + cb-unc-119(+)]</i> I; <i>unc-119(ed3)</i> III                                                                                                       |
| FR1393       | <i>Si12[myo-3p::let-418ORF::3xFLAG::let-418 3'UTR + cb-unc-119(+)]</i> I; <i>unc-119(ed3)</i> III                                                                                                       |
| FR1394       | <i>Si12[myo-3p::let-418ORF::3xFLAG::let-418 3'UTR + cb-unc-119(+)]</i> I; <i>unc-119(ed3)</i> III (?); <i>let-418(n3536)</i> V                                                                          |
| FR1395       | <i>Si13[elt-2p::let-418ORF::3xFLAG::let-418 3'UTR + cb-unc-119(+)]</i> I; <i>unc-119(ed3)</i> III                                                                                                       |
| FR1396       | <i>Si13[elt-2p::let-418ORF::3xFLAG::let-418 3'UTR + cb-unc-119(+)]</i> I; <i>unc-119(ed3)</i> III (?); <i>let-418(n3536)</i> V                                                                          |
| FR1399       | <i>Si10[pie-1p::let-418ORF::3xFLAG::let-418 3'UTR + cb-unc-119(+)]</i> I; <i>unc-119(ed3)</i> III (?); <i>let-418(n3536)</i> V                                                                          |
| FR1403       | <i>Si11[dpy-7p::let-418ORF::3xFLAG::let-418 3'UTR + cb-unc-119(+)]</i> I; <i>unc-119(ed3)</i> III (?); <i>let-418(n3536)</i> V                                                                          |
| FR1425       | <i>Si13[elt-2p::let-418ORF::3xFLAG::let-418 3'UTR + cb-unc-119(+)]</i> I; <i>unc-119(ed3)</i> III (?); <i>let-418(n3536)</i> V; <i>ayIs6[pBH47(hlh-8p::gfp) + dpy-20(+)]</i> X                          |
| FR1427       | <i>wIs51[pMF1(scmp::gfp) + pDP#MM016b(unc-119p::unc-119(+))]</i> V, <i>let-418(n3536)</i> V                                                                                                             |
| FR1458       | <i>Si13[elt-2p::let-418ORF::3xFLAG::let-418 3'UTR + cb-unc-119(+)]</i> I; <i>unc-119(ed3)</i> III (?); <i>wIs51[pMF1(scmp::gfp) + pDP#MM016b(unc-119p::unc-119(+))]</i> V, <i>let-418(n3536)</i> V      |
| FR1459       | <i>Si11[dpy-7p::let-418ORF::3xFLAG::let-418 3'UTR + cb-unc-119(+)]</i> I; <i>unc-119(ed3)</i> III (?); <i>let-418(n3536)</i> V; <i>ayIs6[pBH47(hlh-8p::gfp) + dpy-20(+)]</i> X                          |
| FR1460       | <i>Si11[dpy-7p::let-418ORF::3xFLAG::let-418 3'UTR + cb-unc-119(+)]</i> I; <i>unc-119(ed3)</i> III (?); <i>wIs51[pMF1(scmp::gfp) + pDP#MM016b(unc-119p::unc-119(+))]</i> V, <i>let-418(n3536)</i> V      |
| FR1461       | <i>Si12[myo-3p::let-418ORF::3xFLAG::let-418 3'UTR + cb-unc-119(+)]</i> I; <i>unc-119(ed3)</i> III (?); <i>let-418(n3536)</i> V; <i>ayIs6[pBH47(hlh-8p::gfp) + dpy-20(+)]</i> X                          |
| FR1462       | <i>Si12[myo-3p::let-418ORF::3xFLAG::let-418 3'UTR + cb-unc-119(+)]</i> I; <i>unc-119(ed3)</i> III (?); <i>wIs51[pMF1(scmp::gfp) + pDP#MM016b(unc-119p::unc-119(+))]</i> V, <i>let-418(n3536)</i> V      |
| FR1463       | <i>Si10[pie-1p::let-418ORF::3xFLAG::let-418 3'UTR + cb-unc-119(+)]</i> I; <i>unc-119(ed3)</i> III (?); <i>let-418(n3536)</i> V; <i>ayIs6[pBH47(hlh-8p::gfp) + dpy-20(+)]</i> X                          |
| FR1464       | <i>Si10[pie-1p::let-418ORF::3xFLAG::let-418 3'UTR + cb-unc-119(+)]</i> I; <i>unc-119(ed3)</i> III (?); <i>wIs51[pMF1(scmp::gfp) + pDP#MM016b(unc-119p::unc-119(+))]</i> V, <i>let-418(n3536)</i> V      |
| FR1468       | <i>Si18[hlh-8p::let-418ORF::3xFLAG::let-418 3'UTR + cb-unc-119(+)]</i> I; <i>unc-119(ed3)</i> III                                                                                                       |
| FR1475       | <i>Si22[rgef-1p::let-418ORF::3xFLAG::let-418 3'UTR + cb-unc-119(+)]</i> IV; <i>unc-119(ed3)</i> III                                                                                                     |
| FR1478       | <i>Si18[hlh-8p::let-418ORF::3xFLAG::let-418 3'UTR + cb-unc-119(+)]</i> I; <i>unc-119(ed3)</i> III (?); <i>let-418(n3536)</i> V                                                                          |
| FR1485       | <i>Si18[hlh-8p::let-418ORF::3xFLAG::let-418 3'UTR + cb-unc-119(+)]</i> I; <i>unc-119(ed3)</i> III (?); <i>wIs51[pMF1(scmp::gfp) + pDP#MM016b(unc-119p::unc-119(+))]</i> V, <i>let-418(n3536)</i> V      |
| FR1491       | <i>Si22[rgef-1p::let-418ORF::3xFLAG::let-418 3'UTR + cb-unc-119(+)]</i> IV; <i>unc-119(ed3)</i> III (?); <i>let-418(n3536)</i> V                                                                        |
| FR1492       | <i>Si18[hlh-8p::let-418ORF::3xFLAG::let-418 3'UTR + cb-unc-119(+)]</i> I; <i>unc-119(ed3)</i> III (?); <i>let-418(n3536)</i> V; <i>ayIs6[pBH47(hlh-8p::gfp) + dpy-20(+)]</i> X                          |
| FR1494       | <i>Si13[elt-2p::let-418ORF::3xFLAG::let-418 3'UTR + cb-unc-119(+)]</i> I; <i>daf-2(e1370)</i> III; <i>unc-119(ed3)</i> III (?); <i>let-418(n3536)</i> V                                                 |
| FR1511       | <i>daf-2(e1370)</i> III; <i>let-418(n3536)</i> V; <i>ayIs6[pBH47(hlh-8p::gfp) + dpy-20(+)]</i> X                                                                                                        |
| FR1513       | <i>Si13[elt-2p::let-418ORF::3xFLAG::let-418 3'UTR + cb-unc-119(+)]</i> I; <i>daf-2(e1370)</i> III; <i>unc-119(ed3)</i> III (?); <i>let-418(n3536)</i> V; <i>ayIs6[pBH47(hlh-8p::gfp) + dpy-20(+)]</i> X |
| FR1522       | <i>Si18[hlh-8p::let-418ORF::3xFLAG::let-418 3'UTR + cb-unc-119(+)]</i> I; <i>daf-2(e1370)</i> III; <i>unc-119(ed3)</i> III (?); <i>let-418(n3536)</i> V; <i>ayIs6[pBH47(hlh-8p::gfp) + dpy-20(+)]</i> X |
| FR1523       | <i>Si22[rgef-1p::let-418ORF::3xFLAG::let-418 3'UTR + cb-unc-119(+)]</i> IV; <i>unc-119(ed3)</i> III (?); <i>let-418(n3536)</i> V; <i>ayIs6[pBH47(hlh-8p::gfp) + dpy-20(+)]</i> X                        |
| FR1524       | <i>Si22[rgef-1p::let-418ORF::3xFLAG::let-418 3'UTR + cb-unc-119(+)]</i> IV; <i>unc-119(ed3)</i> III (?); <i>wIs51[pMF1(scmp::gfp) + pDP#MM016b(unc-119p::unc-119(+))]</i> V; <i>let-418(n3536)</i> V    |
| FR1527       | <i>daf-2(e1370)</i> III; <i>ayIs6[pBH47(hlh-8p::gfp) + dpy-20(+)]</i> X                                                                                                                                 |
| FR1528       | <i>Si10[pie-1p::let-418ORF::3xFLAG::let-418 3'UTR + cb-unc-119(+)]</i> I; <i>daf-2(e1370)</i> III; <i>unc-119(ed3)</i> III (?); <i>let-418(n3536)</i> V                                                 |

## Expression constructs

The following plasmids were used in this study:

| Plasmid name | Description                                                                               |
|--------------|-------------------------------------------------------------------------------------------|
| p_C33D3.1_93 | <i>elt-2</i> promoter construct/ pDONRP4-P1R backbone                                     |
| pCW30        | <i>dpy-7</i> promoter construct/ pDONRP4-P1R backbone                                     |
| pCW31        | <i>myo-3</i> promoter construct/ pDONRP4-P1R backbone                                     |
| pMS29        | <i>rgef-1</i> promoter construct/ pDONRP4-P1R backbone                                    |
| pCG142       | <i>pie-1</i> promoter construct/ pDONRP4-P1R backbone                                     |
| pGP6         | <i>let-418</i> 3'UTR construct/ pDONRP2R-P3 backbone                                      |
| pSKP-57      | <i>let-418</i> ORF construct/ pDONR201 backbone                                           |
| pCFJ150      | destination vector containing genomic regions flanking the <i>ttTi5605</i> Mos1 insertion |
| pCFJ210      | destination vector containing genomic regions flanking the <i>ttTi4348</i> Mos1 insertion |
| pMS14        | <i>pie-1p::let-418 ORF::3xFLAG::let-418 3'UTR</i> in pCFJ210                              |
| pMS15        | <i>dpy-7p::let-418 ORF::3xFLAG::let-418 3'UTR</i> in pCFJ210                              |
| pMS16        | <i>myo-3p::let-418 ORF::3xFLAG::let-418 3'UTR</i> in pCFJ210                              |
| pMS17        | <i>elt-2p::let-418 ORF::3xFLAG::let-418 3'UTR</i> in pCFJ210                              |
| pMS31        | <i>rgef-1p::let-418 ORF::3xFLAG::let-418 3'UTR</i> in pCFJ150                             |
| pCW51        | <i>hlh-8p::let-418 ORF::3xFLAG::let-418 3'UTR</i> in pCFJ210                              |

Each expression construct was generated using Multisite Gateway Cloning System (Invitrogen) using plasmids containing a fragment with a tissue-specific promoter (p\_C33D3.1\_93, pCW30, pCW31, pMS29, pCG142), the coding sequence (containing introns) of *let-418* gene fused to 3xflag coding sequence (pSKP-57) and the *let-418* 3'UTR (pGP6), and a MosSCI (Mos1 mediated single copy insertion) compatible destination vector (pCFJ150/pCFJ210). Improved MosSCI technique [1] was used to insert transgenes into a defined site in the *C. elegans* genome. MosSCI transformation was performed based on the protocol described on [www.wormbuilder.org/test-page/protocol](http://www.wormbuilder.org/test-page/protocol).

The protocol for antibody-staining of formaldehyde-fixed worms is described on <http://www.wormatlas.org/antibodystaining.htm>

1. Zeiser, E.; Frokjaer-Jensen, C.; Jorgensen, E.; Ahringer, J. MosSCI and Gateway Compatible Plasmid Toolkit for Constitutive and Inducible Expression of Transgenes in the *C. elegans* Germline. *PLoS One* **2011**, *6*, e20082, doi:10.1371/journal.pone.0020082 PONE-D-11-03764 [pii].
