# Supplementary material
Source: MDPI journal article supplement (https://www.mdpi.com/2221-3759/7/1/1)
Supplement: s1 [file s1]

## Supplemental Figure S1

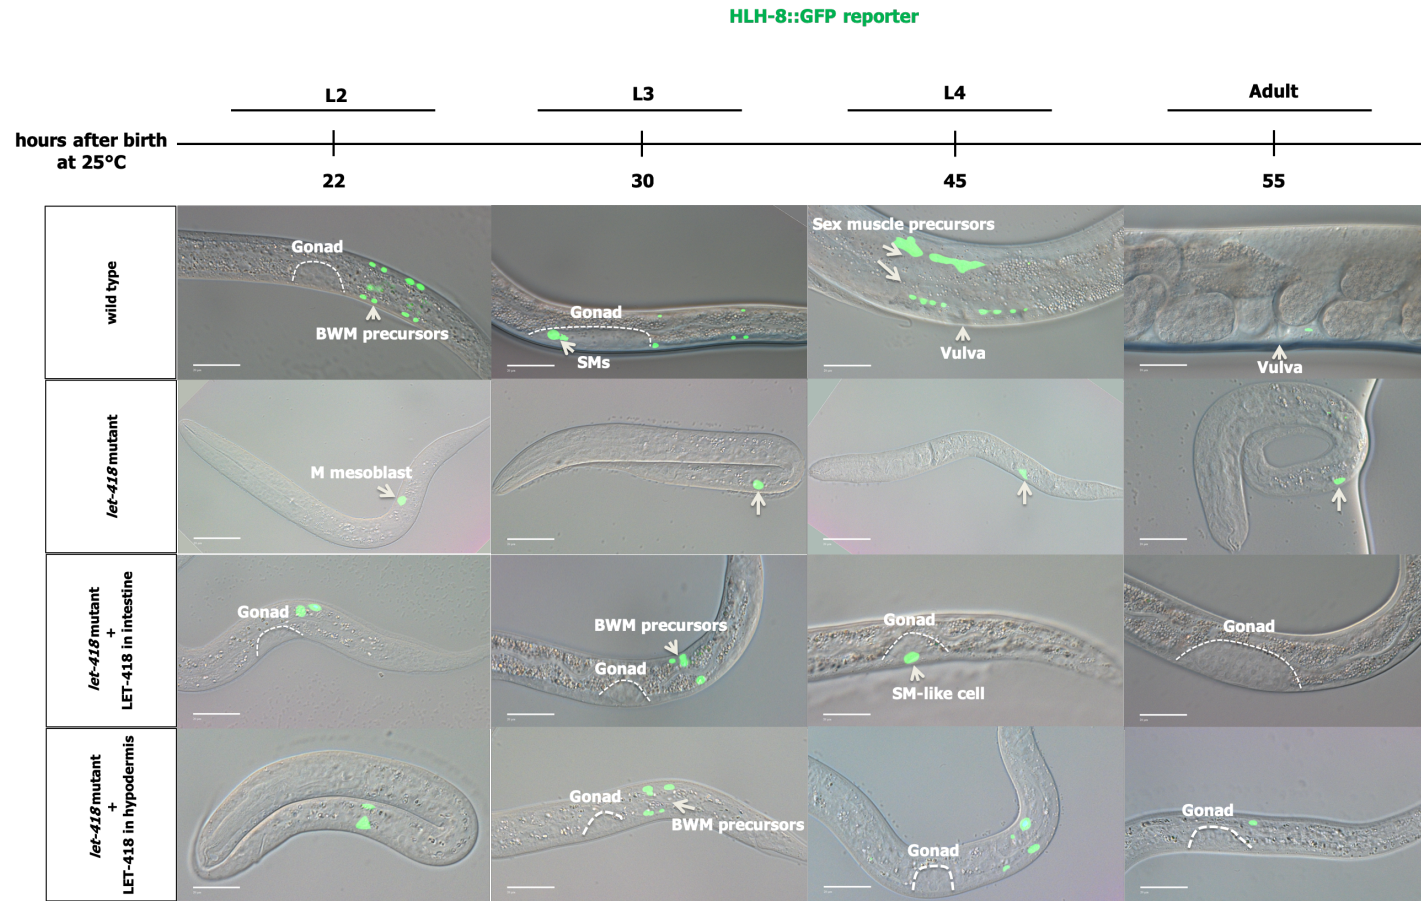

**Supplemental Figure S1. LET-418 is required in the intestine or the hypodermis to trigger post-embryonic development of *let-418* mutant.** Representative pictures are shown for the indicated genetic background. Undifferentiated cell descendant of the M lineage were visualized using *hlh-8::gfp* reporter in 22, 30, 45 and 55 hours after birth. During postembryonic development of wild type worms, M mesoblast undergoes a series of divisions giving rise to BWMs, CCs and sex muscles. In *let-418* L1 larvae, including those with *let-418* expression in muscles, neurons, germ cell precursors or M mesoblast, the M cell does not divide. Worms exhibiting *let-418* expression in the hypodermis or intestine rescue show low levels of M cell division, producing precursors of BWM and sex myoblast-like cells. Scale bar: 20  $\mu$ m.

# Supplemental Table S1

| Percentage of worms exhibiting 1-2 or more HLH-8::GFP positive cells |                         |                    |              |                    |              |                  |              |                  |
|----------------------------------------------------------------------|-------------------------|--------------------|--------------|--------------------|--------------|------------------|--------------|------------------|
| Strains                                                              | Hours after birth (hrs) |                    |              |                    |              |                  |              |                  |
|                                                                      | 22 hrs                  |                    | 30 hrs       |                    | 45 hrs       |                  | 55 hrs       |                  |
|                                                                      | 1 or 2 cells            | >2 cells           | 1 or 2 cells | >2 cells           | 1 or 2 cells | >2 cells         | 1 or 2 cells | >2 cells         |
| wild type                                                            | -                       | <b>100.0% (20)</b> | -            | <b>100.0% (23)</b> | -            | <b>100% (20)</b> | 33.3% (7)    | <b>19.0% (4)</b> |
| <i>let-418(n3536)</i>                                                | 100.0% (21)             | -                  | 100.0% (21)  | -                  | 100.0% (23)  | -                | 100% (22)    | -                |
| <i>let-418(n3536)</i> + LET-418 in intestine                         | 100.0% (30)             | -                  | 67.6% (25)   | <b>32.4% (12)</b>  | 58.8% (20)   | <b>11.8% (4)</b> | 32.6%(14)    | <b>4.7% (2)</b>  |
| <i>let-418(n3536)</i> + LET-418 in hypodermis                        | 100.0% (22)             | -                  | 80.0% (20)   | <b>20.0% (5)</b>   | 38.8% (19)   | <b>10.2% (5)</b> | 21.6% (8)    | <b>2.7% (1)</b>  |
| <i>let-418(n3536)</i> + LET-418 in muscles                           | 100.0% (22)             | -                  | 100.0% (35)  | -                  | 100.0%(30)   | -                | 95.8% (23)   | -                |
| <i>let-418(n3536)</i> + LET-418 in neurons                           | 100.0% (27)             | -                  | 100.0% (22)  | -                  | 100.0% (21)  | -                | 85.7% (18)   | -                |
| <i>let-418(n3536)</i> + LET-418 in germline                          | 100.0% (21)             | -                  | 100.0% (21)  | -                  | 100.0% (33)  | -                | 90.9% (20)   | -                |
| <i>let-418(n3536)</i> + LET-418 in M cell                            | 100.0% (33)             | -                  | 100.0% (30)  | -                  | 100.0% (21)  | -                | 93.3% (28)   | -                |



Supplemental Table S2

| Average number of HLH-8::GFP positive cells      |                                               |                        |                        |                |
|--------------------------------------------------|-----------------------------------------------|------------------------|------------------------|----------------|
| Strains                                          | Hours after birth (hrs); number of worms (n=) |                        |                        |                |
|                                                  | 22 hrs (n=)                                   | 30 hrs (n=)            | 45 hrs (n=)            | 55 hrs (n=)    |
| wild type                                        | <b>16.3 ± 1.2 (20)</b>                        | <b>18.0 ± 0.0 (23)</b> | <b>16.0 ± 0.0 (20)</b> | 1.3 ± 1.4 (21) |
| <i>let-418(n3536)</i>                            | 1.1 ± 0.3 (21)                                | 1.1 ± 0.3 (21)         | 1.1 ± 0.3 (23)         | 1.1 ± 0.3 (22) |
| <i>let-418(n3536)</i> + LET-418<br>in intestine  | 1.1 ± 0.3 (30)                                | <b>2.4 ± 1.8 (37)</b>  | 1.4 ± 1.8 (34)         | 0.6 ± 0.9 (43) |
| <i>let-418(n3536)</i> + LET-418<br>in hypodermis | 1.2 ± 0.4 (22)                                | <b>2.2 ± 2.0 (25)</b>  | 0.8 ± 1.1 (49)         | 0.4 ± 0.8 (37) |
| <i>let-418(n3536)</i> + LET-418<br>in muscles    | 1.1 ± 0.3 (22)                                | 1.1 ± 0.3 (35)         | 1.0 ± 0.2 (30)         | 1.0 ± 0.4 (24) |
| <i>let-418(n3536)</i> + LET-418<br>in neurons    | 1.1 ± 0.3 (27)                                | 1.0 ± 0.2 (22)         | 1.0 ± 0.2 (21)         | 1.0 ± 0.5 (21) |
| <i>let-418(n3536)</i> + LET-418<br>in germline   | 1.1 ± 0.3 (21)                                | 1.1 ± 0.3 (21)         | 1.1 ± 0.3 (33)         | 1.1 ± 0.5 (22) |
| <i>let-418(n3536)</i> + LET-418<br>in M cell     | 1.2 ± 0.4 (33)                                | <b>1.4 ± 0.5 (30)</b>  | 1.2 ± 0.4 (21)         | 1.2 ± 0.5 (30) |

**Bold: p values <0.05**

## Supplemental Figure S2

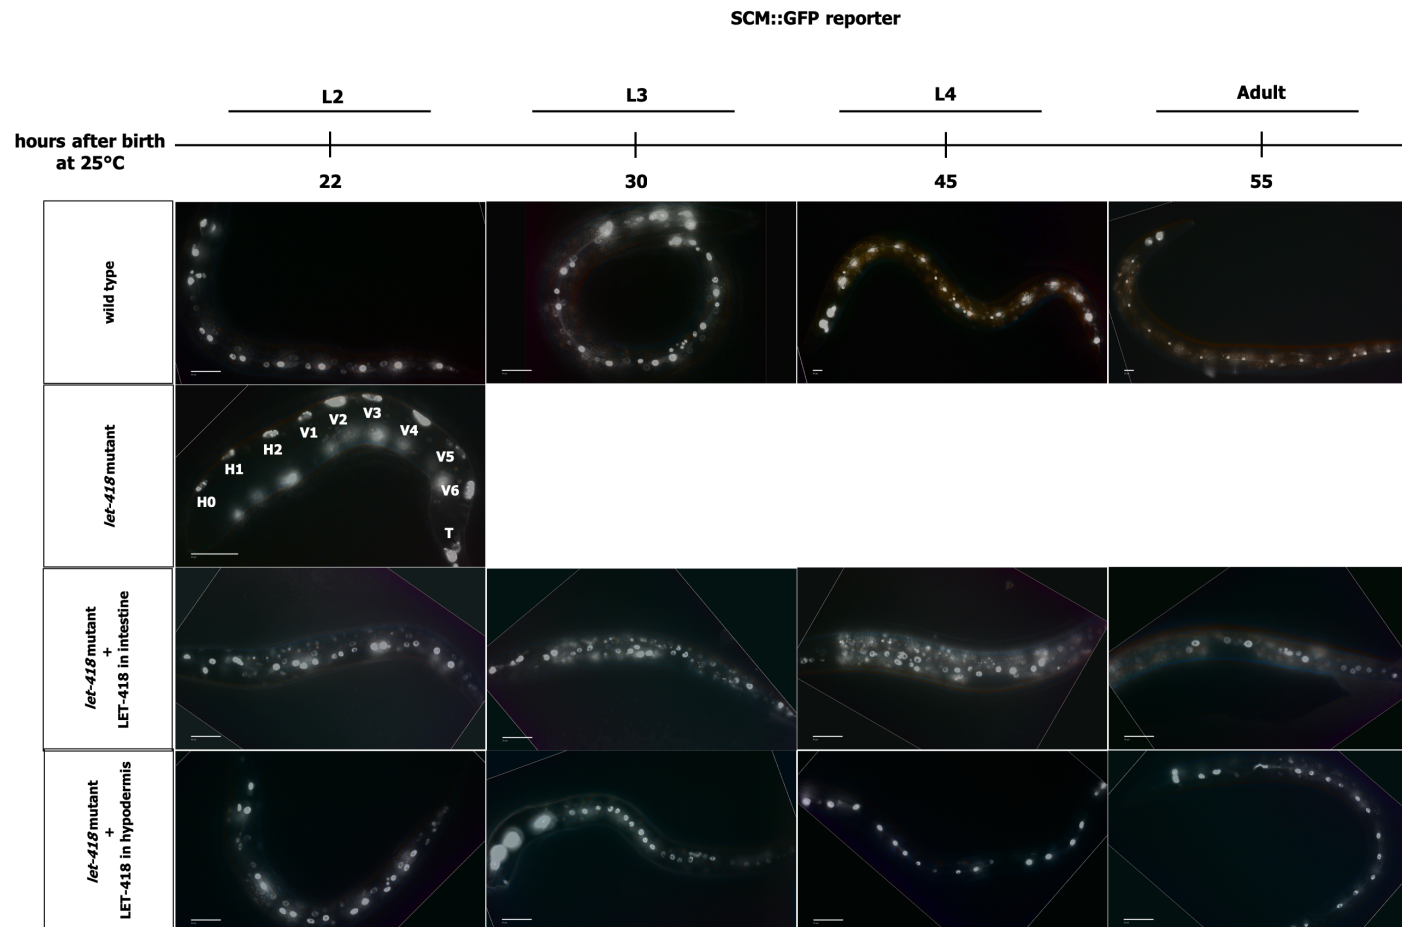

**Supplemental Figure S2. Intestine-specific or hypodermis-specific *let-418* expression partially rescues seam cell divisions in *let-418(n3536)* mutants.** Seam-cell lineage tracing of wild type and *let-418(n3536)* animals exhibiting *let-418* expression in the indicated tissues. Seam cells were visualized by the seam cell specific reporter *scm::gfp* 22, 30, 45 and 55 hours after birth. In *let-418(n3536)* worms, including those with *let-418* expression in neurons, muscles, M cell or germline seam cells fail to divide. Scale bar: 20  $\mu$ m.

## Supplemental Table S3

| Percentage of worms exhibiting 10-14 or more SCM::GFP positive cells |                         |                  |               |                  |               |                  |               |                  |
|----------------------------------------------------------------------|-------------------------|------------------|---------------|------------------|---------------|------------------|---------------|------------------|
| Strains                                                              | Hours after birth (hrs) |                  |               |                  |               |                  |               |                  |
|                                                                      | 22 hrs                  |                  | 30 hrs        |                  | 45 hrs        |                  | 55 hrs        |                  |
|                                                                      | 10 - 14 cells           | >14 cells        | 10 - 14 cells | >14 cells        | 10 - 14 cells | >14 cells        | 10 - 14 cells | >14 cells        |
| wild type                                                            | -                       | <b>100% (32)</b> | -             | <b>100% (20)</b> | -             | <b>100% (21)</b> | -             | <b>100% (21)</b> |
| <i>let-418(n3536)</i>                                                | 100% (21)               | -                | 100% (25)     | -                | 100% (20)     | -                | 100% (22)     | -                |
| <i>let-418(n3536)</i> + LET-418 in intestine                         | -                       | <b>100% (24)</b> | -             | <b>100% (21)</b> | -             | <b>100% (38)</b> | -             | <b>100% (30)</b> |
| <i>let-418(n3536)</i> + LET-418 in hypodermis                        | -                       | <b>100% (37)</b> | -             | <b>100% (20)</b> | 3% (1)        | <b>97% (37)</b>  | 4% (1)        | <b>96% (26)</b>  |
| <i>let-418(n3536)</i> + LET-418 in muscles                           | 100% (33)               | -                | 100% (20)     | -                | 100% (21)     | -                | 100% (20)     | -                |
| <i>let-418(n3536)</i> + LET-418 in neurons                           | 100% (21)               | -                | 100% (23)     | -                | 100% (21)     | -                | 100% (25)     | -                |
| <i>let-418(n3536)</i> + LET-418 in germline                          | 100% (33)               | -                | 100% (21)     | -                | 100% (25)     | -                | 100% (25)     | -                |
| <i>let-418(n3536)</i> + LET-418 in M cell                            | 100% (21)               | -                | 100% (21)     | -                | 100% (23)     | -                | 100% (21)     | -                |

Supplemental Table S4

| Average number of SCM::GFP positive cells        |                                               |                        |                        |                        |
|--------------------------------------------------|-----------------------------------------------|------------------------|------------------------|------------------------|
| Strains                                          | Hours after birth (hrs); number of worms (n=) |                        |                        |                        |
|                                                  | 22 hrs (n=)                                   | 30 hrs (n=)            | 45 hrs (n=)            | 55 hrs (n=)            |
| wild type                                        | <b>33.1 ± 1.8 (32)</b>                        | <b>51.5 ± 1.9 (20)</b> | <b>71.3 ± 1.9 (21)</b> | <b>17.0 ± 0.9 (21)</b> |
| <i>let-418(n3536)</i>                            | 10.5 ± 1.0 (21)                               | 10.6 ± 0.9 (25)        | 10.6 ± 0.7 (20)        | 10.8 ± 1.0 (22)        |
| <i>let-418(n3536)</i> + LET-418<br>in intestine  | <b>31.3 ± 2.2 (24)</b>                        | <b>36.2 ± 2.6 (21)</b> | <b>42.3 ± 6.7 (38)</b> | <b>25.1 ± 4.0 (30)</b> |
| <i>let-418(n3536)</i> + LET-418<br>in hypodermis | <b>32.2 ± 3.6 (37)</b>                        | <b>26.2 ± 3.4 (20)</b> | <b>15.5 ± 3.9 (38)</b> | <b>17.9 ± 2.0 (27)</b> |
| <i>let-418(n3536)</i> + LET-418<br>in muscles    | 10.4 ± 0.7 (33)                               | 10.7 ± 0.9 (20)        | 10.7 ± 0.8 (21)        | 10.5 ± 0.7 (20)        |
| <i>let-418(n3536)</i> + LET-418<br>in neurons    | 10.7 ± 1.2 (21)                               | 10.7 ± 1.2 (23)        | 10.8 ± 1.2 (21)        | 10.7 ± 1.1 (25)        |
| <i>let-418(n3536)</i> + LET-418<br>in germline   | 10.4 ± 0.7 (33)                               | 10.4 ± 0.7 (21)        | 10.2 ± 0.4 (25)        | 10.6 ± 0.7 (25)        |
| <i>let-418(n3536)</i> + LET-418<br>in M cell     | 10.4 ± 0.7 (21)                               | 10.4 ± 0.7 (21)        | 10.4 ± 0.6 (23)        | 10.4 ± 0.6 (21)        |

**Bold: p values <0.05**



# Supplemental Figure S3

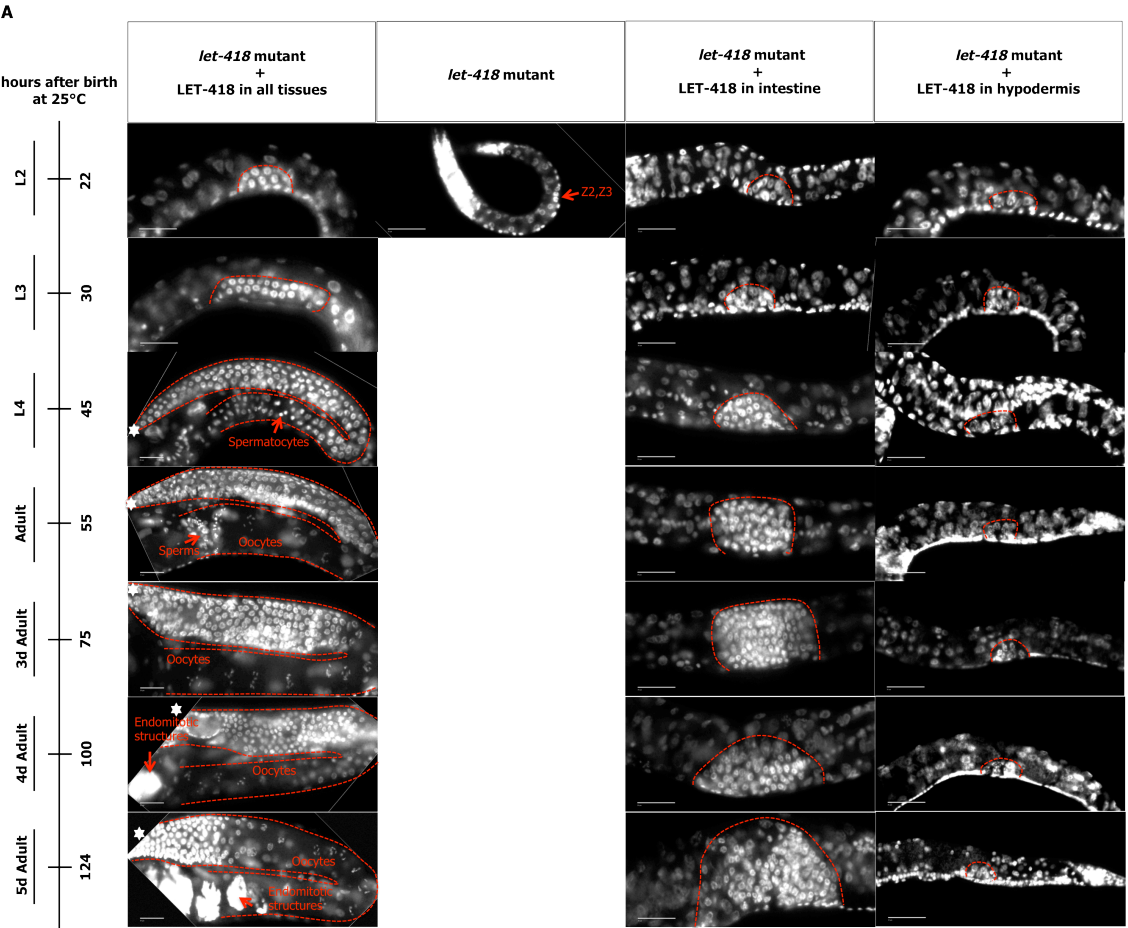

**Sup Fig. 3. Germ cell proliferation and differentiation in worms expressing *let-418* in various tissues.**

(A) DAPI-stained germline of *let-418(n3536)*, and LET-418/Mi-2 tissue-specific rescued lines. Germline development was followed during six days after birth. Germ cells were counted at 22, 30, 45, 55, 75, 100, 124 and 148 hours after birth. In *let-418* L1 larvae, including those with LET-418 expression in muscles, M cell, neurons, or PGCs, the Z2 and Z3 cells did not divide. *let-418(n3536)* mutants were completely rescued to the wild type level with LET-418/Mi-2 under its own promoter. Scale bar. 20 μm. **A1.** Worms with hypodermal LET-418/Mi-2 expression had undeveloped gonads and low levels of germ cell proliferation. Animals rescued with intestinal LET-418/Mi-2 expression had mainly unextended gonadal arm filled with proliferative nuclei.

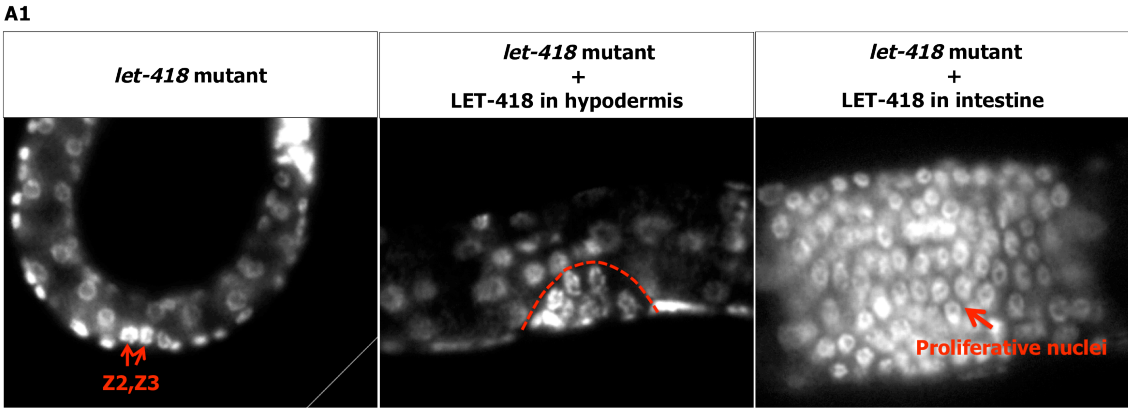

# Supplemental Table S5

| Percentage of worms exhibiting 2-3 or more germ cells |                       |                                                      |                                                    |                                                     |                                                  |                                                  |                                                   |                                                 |
|-------------------------------------------------------|-----------------------|------------------------------------------------------|----------------------------------------------------|-----------------------------------------------------|--------------------------------------------------|--------------------------------------------------|---------------------------------------------------|-------------------------------------------------|
| Hours after birth<br>(hrs)                            | Strains               |                                                      |                                                    |                                                     |                                                  |                                                  |                                                   |                                                 |
|                                                       | <i>let-418(n3536)</i> | <i>let-418(n3536)</i><br>+ LET-418 in all<br>tissues | <i>let-418(n3536)</i><br>+ LET-418 in<br>intestine | <i>let-418(n3536)</i><br>+ LET-418 in<br>hypodermis | <i>let-418(n3536)</i><br>+ LET-418 in<br>muscles | <i>let-418(n3536)</i><br>+ LET-418 in<br>neurons | <i>let-418(n3536)</i><br>+ LET-418 in<br>germline | <i>let-418(n3536)</i><br>+ LET-418 in M<br>cell |
| 22 hrs                                                |                       |                                                      |                                                    |                                                     |                                                  |                                                  |                                                   |                                                 |
| 2 - 3 cells                                           | 100.0% (15)           | -                                                    | -                                                  | 22.5% (9)                                           | 100.0% (22)                                      | 100.0% (21)                                      | 100.0% (20)                                       | 100.0% (20)                                     |
| >3 cells                                              | -                     | <b>100.0% (11)</b>                                   | <b>100.0% (20)</b>                                 | <b>77.5% (31)</b>                                   | -                                                | -                                                | -                                                 | -                                               |
| 30 hrs                                                |                       |                                                      |                                                    |                                                     |                                                  |                                                  |                                                   |                                                 |
| 2 - 3 cells                                           | 100.0% (17)           | -                                                    | -                                                  | 7.4% (2)                                            | 100.0% (23)                                      | 100.0% (22)                                      | 100.0% (20)                                       | 100.0% (21)                                     |
| >3 cells                                              | -                     | <b>100.0% (13)</b>                                   | <b>100.0% (20)</b>                                 | <b>92.6 (25)</b>                                    | -                                                | -                                                | -                                                 | -                                               |
| 45 hrs                                                |                       |                                                      |                                                    |                                                     |                                                  |                                                  |                                                   |                                                 |
| 2 - 3 cells                                           | 100.0% (11)           | -                                                    | -                                                  | -                                                   | 100.0% (22)                                      | 100.0% (20)                                      | 100.0% (21)                                       | 100.0% (20)                                     |
| >3 cells                                              | -                     | <b>100.0% (15)</b>                                   | <b>100.0% (28)</b>                                 | <b>100.0% (41)</b>                                  | -                                                | -                                                | -                                                 | -                                               |
| 55 hrs                                                |                       |                                                      |                                                    |                                                     |                                                  |                                                  |                                                   |                                                 |
| 2 - 3 cells                                           | 100.0% (14)           | -                                                    | -                                                  | -                                                   | 100.0% (20)                                      | 100.0% (21)                                      | 100.0% (23)                                       | 100.0% (23)                                     |
| >3 cells                                              | -                     | <b>100.0% (5)</b>                                    | <b>100.0% (20)</b>                                 | <b>100.0% (20)</b>                                  | -                                                | -                                                | -                                                 | -                                               |
| 75 hrs                                                |                       |                                                      |                                                    |                                                     |                                                  |                                                  |                                                   |                                                 |
| 2 - 3 cells                                           |                       | -                                                    | -                                                  | 2.7% (1)                                            |                                                  |                                                  |                                                   |                                                 |
| >3 cells                                              |                       | <b>100.0% (10)</b>                                   | <b>100.0% (36)</b>                                 | <b>97.3% (36)</b>                                   |                                                  |                                                  |                                                   |                                                 |
| 100 hrs                                               |                       |                                                      |                                                    |                                                     |                                                  |                                                  |                                                   |                                                 |
| 2 - 3 cells                                           |                       | -                                                    | -                                                  | -                                                   |                                                  |                                                  |                                                   |                                                 |
| >3 cells                                              |                       | <b>100.0% (8)</b>                                    | <b>100.0% (20)</b>                                 | <b>100.0% (36)</b>                                  |                                                  |                                                  |                                                   |                                                 |
| 124 hrs                                               |                       |                                                      |                                                    |                                                     |                                                  |                                                  |                                                   |                                                 |
| 2 - 3 cells                                           |                       | -                                                    | -                                                  | -                                                   |                                                  |                                                  |                                                   |                                                 |
| >3 cells                                              |                       | <b>100.0% (9)</b>                                    | <b>100.0% (27)</b>                                 | <b>100.0% (26)</b>                                  |                                                  |                                                  |                                                   |                                                 |
| 148 hrs                                               |                       |                                                      |                                                    |                                                     |                                                  |                                                  |                                                   |                                                 |
| 2 - 3 cells                                           |                       | -                                                    | -                                                  | -                                                   |                                                  |                                                  |                                                   |                                                 |
| >3 cells                                              |                       | <b>100.0% (5)</b>                                    | <b>100.0% (20)</b>                                 | <b>100.0% (20)</b>                                  |                                                  |                                                  |                                                   |                                                 |

# Supplemental Table S6

| Hours after birth (hrs)     | Average number of germ cells |                                                |                                              |                                               |                                            |                                            |                                             |                                           |
|-----------------------------|------------------------------|------------------------------------------------|----------------------------------------------|-----------------------------------------------|--------------------------------------------|--------------------------------------------|---------------------------------------------|-------------------------------------------|
|                             | Strains                      |                                                |                                              |                                               |                                            |                                            |                                             |                                           |
|                             | <i>let-418(n3536)</i>        | <i>let-418(n3536)</i> + LET-418 in all tissues | <i>let-418(n3536)</i> + LET-418 in intestine | <i>let-418(n3536)</i> + LET-418 in hypodermis | <i>let-418(n3536)</i> + LET-418 in muscles | <i>let-418(n3536)</i> + LET-418 in neurons | <i>let-418(n3536)</i> + LET-418 in germline | <i>let-418(n3536)</i> + LET-418 in M cell |
| 22 hrs                      |                              |                                                |                                              |                                               |                                            |                                            |                                             |                                           |
| undifferentiated germ cells | 2.1 ± 0.2 (15)               | <b>17.1 ± 1.3 (11)</b>                         | <b>14.0 ± 3.0 (20)</b>                       | <b>3.3 ± 1.0 (40)</b>                         | 2.1 ± 0.3 (22)                             | 2.0 ± 0.2 (21)                             | 2.1 ± 0.2 (20)                              | 2.1 ± 0.2 (20)                            |
| 30 hrs                      |                              |                                                |                                              |                                               |                                            |                                            |                                             |                                           |
| undifferentiated germ cells | 2.1 ± 0.2 (17)               | <b>55.5 ± 2.3 (13)</b>                         | <b>27.1 ± 3.8 (20)</b>                       | <b>5.0 ± 1.2 (27)</b>                         | 2.1 ± 0.3 (23)                             | 2.0 ± 0.2 (22)                             | 2.0 ± 0.0 (20)                              | 2.0 ± 0.2 (21)                            |
| 45 hrs                      |                              |                                                |                                              |                                               |                                            |                                            |                                             |                                           |
| undifferentiated germ cells | 2.1 ± 0.3 (11)               | <b>443.2 ± 8.3 (15)</b>                        | <b>55.4 ± 11.8 (28)</b>                      | <b>7.1 ± 1.4 (41)</b>                         | 2.1 ± 0.3 (22)                             | 2.1 ± 0.3 (20)                             | 2.0 ± 0.2 (21)                              | 2.0 ± 0.0 (20)                            |
| 55 hrs                      |                              |                                                |                                              |                                               |                                            |                                            |                                             |                                           |
| undifferentiated germ cells | 2.1 ± 0.3 (14)               | <b>864.2 ± 9.2 (5)</b>                         | <b>79.5 ± 26.4 (20)</b>                      | <b>7.2 ± 1.0 (20)</b>                         | 2.1 ± 0.3 (20)                             | 2.1 ± 0.3 (21)                             | 2.0 ± 0.2 (23)                              | 2.0 ± 0.2 (23)                            |
| sperms                      | -                            | 268.4 ± 5.9 (5)                                | -                                            | -                                             | -                                          | -                                          | -                                           | -                                         |
| oocytes                     | -                            | 9.8 ± 1.8 (5)                                  | -                                            | -                                             | -                                          | -                                          | -                                           | -                                         |
| Total number of germ cells  | 2.1 (14)                     | 1142.4 (5)                                     | 79.5 (20)                                    | 7.2 (20)                                      | 2.1 (20)                                   | 2.1 (21)                                   | 2.0 (23)                                    | 2.0 (23)                                  |
| 75 hrs                      |                              |                                                |                                              |                                               |                                            |                                            |                                             |                                           |
| undifferentiated germ cells |                              | <b>1195.4 ± 17.1 (10)</b>                      | <b>93.6 ± 34 (36)</b>                        | <b>7.7 ± 2.1 (37)</b>                         |                                            |                                            |                                             |                                           |
| sperms                      |                              | 32.6 ± 6.5 (10)                                | 1.8 ± 6.0 (36)                               | -                                             |                                            |                                            |                                             |                                           |
| oocytes                     |                              | 19.3 ± 2.5 (10)                                | -                                            | -                                             |                                            |                                            |                                             |                                           |
| Total number of germ cells  |                              | 1247.3 (10)                                    | 95.4 (36)                                    | 7.7 (37)                                      |                                            |                                            |                                             |                                           |
| 100 hrs                     |                              |                                                |                                              |                                               |                                            |                                            |                                             |                                           |
| undifferentiated germ cells |                              | <b>1058.1 ± 21.6 (8)</b>                       | <b>104.7 ± 25.8 (20)</b>                     | <b>8.7 ± 2.2 (36)</b>                         |                                            |                                            |                                             |                                           |
| sperms                      |                              | 2.0 ± 2.6 (8)                                  | 1.4 ± 3.8 (20)                               | -                                             |                                            |                                            |                                             |                                           |
| oocytes                     |                              | 28.8 ± 6.1 (8)                                 | -                                            | -                                             |                                            |                                            |                                             |                                           |
| Total number of germ cells  |                              | 1088.9 (8)                                     | 106.1 (20)                                   | 8.7 (36)                                      |                                            |                                            |                                             |                                           |
| 124 hrs                     |                              |                                                |                                              |                                               |                                            |                                            |                                             |                                           |
| undifferentiated germ cells |                              | <b>1024.2 ± 24.2 (9)</b>                       | <b>123.6 ± 39.8 (27)</b>                     | <b>10.0 ± 2.6 (26)</b>                        |                                            |                                            |                                             |                                           |
| sperms                      |                              | -                                              | 1.0 ± 2.5 (27)                               | -                                             |                                            |                                            |                                             |                                           |
| oocytes                     |                              | 32.6 ± 8.4 (9)                                 | -                                            | -                                             |                                            |                                            |                                             |                                           |
| Total number of germ cells  |                              | 1056.8 (9)                                     | 124.6 (27)                                   | 10.0 (26)                                     |                                            |                                            |                                             |                                           |
| 148 hrs                     |                              |                                                |                                              |                                               |                                            |                                            |                                             |                                           |
| undifferentiated germ cells |                              | <b>928.0 ± 25.2 (5)</b>                        | <b>95.0 ± 25.1 (20)</b>                      | <b>12.5 ± 2.2 (20)</b>                        |                                            |                                            |                                             |                                           |
| sperms                      |                              | -                                              | 0.2 ± 0.7 (20)                               | -                                             |                                            |                                            |                                             |                                           |
| oocytes                     |                              | 26.8 ± 6.6 (5)                                 | -                                            | -                                             |                                            |                                            |                                             |                                           |
| Total number of germ cells  |                              | 954.8 (5)                                      | 95.1 (20)                                    | 12.5 (20)                                     |                                            |                                            |                                             |                                           |

**Bold: p values <0.05**

# Supplemental Table S7

| Percentage of worms exhibiting 1-2 or more HLH-8::GFP positive cells |                         |                    |              |                    |              |                   |              |                   |
|----------------------------------------------------------------------|-------------------------|--------------------|--------------|--------------------|--------------|-------------------|--------------|-------------------|
| Strains                                                              | Hours after birth (hrs) |                    |              |                    |              |                   |              |                   |
|                                                                      | 22 hrs                  |                    | 30 hrs       |                    | 45 hrs       |                   | 55 hrs       |                   |
|                                                                      | 1 or 2 cells            | >2 cells           | 1 or 2 cells | >2 cells           | 1 or 2 cells | >2 cells          | 1 or 2 cells | >2 cells          |
| wild type                                                            | -                       | <b>100.0% (20)</b> | -            | <b>100.0% (23)</b> | -            | <b>100% (20)</b>  | 33.3% (7)    | <b>19.0% (4)</b>  |
| <i>let-418(n3536)</i>                                                | 100.0% (21)             | -                  | 100.0% (21)  | -                  | 100.0% (23)  | -                 | 100% (22)    | -                 |
| <i>let-418(n3536)</i> + LET-418 in intestine                         | 100.0% (30)             | -                  | 67.6% (25)   | <b>32.4% (12)</b>  | 58.8% (20)   | <b>11.8% (4)</b>  | 32.6%(14)    | <b>4.7% (2)</b>   |
| <i>let-418(n3536)</i> + LET-418 in M cell                            | 100.0% (33)             | -                  | 100.0% (30)  | -                  | 100.0% (21)  | -                 | 93.3% (28)   | -                 |
| <i>let-418(n3536)</i> + LET-418 in intestine and M cell              | 73.3% (22)              | <b>26.7% (8)</b>   | 21.7% (5)    | <b>78.3% (18)</b>  | 22.7% (5)    | <b>77.3% (17)</b> | 4.8% (1)     | <b>95.2% (20)</b> |
| <i>let-418(n3536)</i> + LET-418 in hypodermis                        | 100.0% (22)             | -                  | 80.0% (20)   | <b>20.0% (5)</b>   | 38.8% (19)   | <b>10.2% (5)</b>  | 21.6% (8)    | <b>2.7% (1)</b>   |
| <i>let-418(n3536)</i> + LET-418 in intestine and hypodermis          | 100.0% (29)             | -                  | 38.1% (8)    | <b>61.9% (13)</b>  | 55.3% (21)   | <b>10.5% (4)</b>  | 25.0% (5)    | <b>10.0% (2)</b>  |
| <i>let-418(n3536)</i> + LET-418 in muscles                           | 100.0% (22)             | -                  | 100.0% (35)  | -                  | 100.0%(30)   | -                 | 95.8% (23)   | -                 |
| <i>let-418(n3536)</i> + LET-418 in intestine and muscles             | 96.0% (24)              | <b>4.0% (1)</b>    | 75.0% (15)   | <b>25.0% (5)</b>   | 26.1% (6)    | <b>26.1% (6)</b>  | 30.0% (6)    | <b>15.0% (3)</b>  |
| <i>let-418(n3536)</i> + LET-418 in neurons                           | 100.0% (27)             | -                  | 100.0% (22)  | -                  | 100.0% (21)  | -                 | 85.7% (18)   | -                 |
| <i>let-418(n3536)</i> + LET-418 in intestine and neurons             | 100.0% (20)             | -                  | 75.0% (15)   | <b>25.0% (5)</b>   | 40.0% (8)    | <b>25.0% (5)</b>  | 42.9% (9)    | <b>4.8% (1)</b>   |
| <i>let-418(n3536)</i> + LET-418 in germline                          | 100.0% (21)             | -                  | 100.0% (21)  | -                  | 100.0% (33)  | -                 | 90.9% (20)   | -                 |
| <i>let-418(n3536)</i> + LET-418 in intestine and germline            | 96.3% (26)              | <b>3.7% (1)</b>    | 76.2% (16)   | <b>23.8% (5)</b>   | 28.6% (6)    | <b>19.0% (4)</b>  | 35.0% (7)    | -                 |



Supplemental Table S8

| Average number of HLH-8::GFP positive cells                 |                                               |                        |                        |                       |
|-------------------------------------------------------------|-----------------------------------------------|------------------------|------------------------|-----------------------|
| Strains                                                     | Hours after birth (hrs); number of worms (n=) |                        |                        |                       |
|                                                             | 22 hrs (n=)                                   | 30 hrs (n=)            | 45 hrs (n=)            | 55 hrs (n=)           |
| wild type                                                   | <b>16.3 ± 1.2 (20)</b>                        | <b>18.0 ± 0.0 (23)</b> | <b>16.0 ± 0.0 (20)</b> | 1.3 ± 1.4 (21)        |
| <i>let-418(n3536)</i>                                       | 1.1 ± 0.3 (21)                                | 1.1 ± 0.3 (21)         | 1.1 ± 0.3 (23)         | 1.1 ± 0.3 (22)        |
| <i>let-418(n3536)</i> + LET-418 in intestine                | 1.1 ± 0.3 (30)                                | <b>2.4 ± 1.8 (37)</b>  | 1.4 ± 1.8 (34)         | 0.6 ± 0.9 (43)        |
| <i>let-418(n3536)</i> + LET-418 in M cell                   | 1.2 ± 0.4 (33)                                | 1.4 ± 0.5 (30)         | 1.2 ± 0.4 (21)         | 1.2 ± 0.5 (30)        |
| <i>let-418(n3536)</i> + LET-418 in intestine and M cell     | <b>2.3 ± 1.8 (30)</b>                         | <b>9.1 ± 5.6 (23)</b>  | <b>5.8 ± 3.3 (22)</b>  | <b>5.7 ± 1.5 (21)</b> |
| <i>let-418(n3536)</i> + LET-418 in hypodermis               | 1.2 ± 0.4 (22)                                | <b>2.2 ± 2.0 (25)</b>  | 0.8 ± 1.1 (49)         | 0.4 ± 0.8 (37)        |
| <i>let-418(n3536)</i> + LET-418 in intestine and hypodermis | 1.2 ± 0.4 (29)                                | <b>2.6 ± 1.2 (21)</b>  | 1.3 ± 1.7 (38)         | 0.8 ± 1.3 (20)        |
| <i>let-418(n3536)</i> + LET-418 in muscles                  | 1.1 ± 0.3 (22)                                | 1.1 ± 0.3 (35)         | 1.0 ± 0.2 (30)         | 1.0 ± 0.4 (24)        |
| <i>let-418(n3536)</i> + LET-418 in intestine and muscles    | 1.6 ± 0.7 (25)                                | <b>2.3 ± 1.6 (20)</b>  | 1.7 ± 2.6 (23)         | 1.0 ± 1.2 (20)        |
| <i>let-418(n3536)</i> + LET-418 in neurons                  | 1.1 ± 0.3 (27)                                | 1.0 ± 0.2 (22)         | 1.0 ± 0.2 (21)         | 1.0 ± 0.5 (21)        |
| <i>let-418(n3536)</i> + LET-418 in intestine and neurons    | 1.2 ± 0.4 (20)                                | <b>2.0 ± 1.0 (20)</b>  | 1.8 ± 2.2 (20)         | 0.8 ± 0.9 (21)        |
| <i>let-418(n3536)</i> + LET-418 in germline                 | 1.1 ± 0.3 (21)                                | 1.1 ± 0.3 (21)         | 1.1 ± 0.3 (33)         | 1.1 ± 0.5 (22)        |
| <i>let-418(n3536)</i> + LET-418 in intestine and germline   | 1.5 ± 0.6 (27)                                | <b>2.0 ± 0.9 (21)</b>  | 1.4 ± 2.1 (21)         | 0.4 ± 0.6 (20)        |

**Bold: p values <0.05**

# Supplemental Table S9

| Percentage of worms exhibiting 1-2 or more HLH-8::GFP positive cells |                         |                    |              |                    |              |                   |              |                   |
|----------------------------------------------------------------------|-------------------------|--------------------|--------------|--------------------|--------------|-------------------|--------------|-------------------|
| Strains                                                              | Hours after birth (hrs) |                    |              |                    |              |                   |              |                   |
|                                                                      | 22 hrs                  |                    | 30 hrs       |                    | 45 hrs       |                   | 55 hrs       |                   |
|                                                                      | 1 or 2 cells            | >2 cells           | 1 or 2 cells | >2 cells           | 1 or 2 cells | >2 cells          | 1 or 2 cells | >2 cells          |
| wild type                                                            | -                       | <b>100.0% (20)</b> | -            | <b>100.0% (23)</b> | -            | <b>100% (20)</b>  | 33.3% (7)    | <b>19.0% (4)</b>  |
| <i>let-418(n3536)</i>                                                | 100.0% (21)             | -                  | 100.0% (21)  | -                  | 100.0% (23)  | -                 | 100% (22)    | -                 |
| <i>let-418(n3536)</i> + LET-418 in hypodermis                        | 100.0% (22)             | -                  | 80.0% (20)   | <b>20.0% (5)</b>   | 38.8% (19)   | <b>10.2% (5)</b>  | 21.6% (8)    | <b>2.7% (1)</b>   |
| <i>let-418(n3536)</i> + LET-418 in M cell                            | 100.0% (33)             | -                  | 100.0% (30)  | -                  | 100.0% (21)  | -                 | 93.3% (28)   | -                 |
| <i>let-418(n3536)</i> + LET-418 in hypodermis and M cell             | 82.8% (24)              | <b>17.2% (5)</b>   | 9.5% (2)     | <b>90.5% (19)</b>  | 33.3% (8)    | <b>66.7% (16)</b> | 23.8% (5)    | <b>71.4% (15)</b> |
| <i>let-418(n3536)</i> + LET-418 in intestine                         | 100.0% (30)             | -                  | 67.6% (25)   | <b>32.4% (12)</b>  | 58.8% (20)   | <b>11.8% (4)</b>  | 32.6%(14)    | <b>4.7% (2)</b>   |
| <i>let-418(n3536)</i> + LET-418 in hypodermis and intestine          | 100.0% (29)             | -                  | 38.1% (8)    | <b>61.9% (13)</b>  | 55.3% (21)   | <b>10.5% (4)</b>  | 25.0% (5)    | <b>10.0% (2)</b>  |
| <i>let-418(n3536)</i> + LET-418 in muscles                           | 100.0% (22)             | -                  | 100.0% (35)  | -                  | 100.0%(30)   | -                 | 95.8% (23)   | -                 |
| <i>let-418(n3536)</i> + LET-418 in hypodermis and muscles            | 94.6% (35)              | <b>5.4% (2)</b>    | 52.4% (11)   | <b>47.6% (10)</b>  | 52.4% (22)   | <b>2.4% (1)</b>   | 10.0% (2)    | <b>10.0% (2)</b>  |
| <i>let-418(n3536)</i> + LET-418 in neurons                           | 100.0% (27)             | -                  | 100.0% (22)  | -                  | 100.0% (21)  | -                 | 85.7% (18)   | -                 |
| <i>let-418(n3536)</i> + LET-418 in hypodermis and neurons            | 100.0% (24)             | -                  | 72.0% (18)   | <b>28.0% (7)</b>   | 56.5% (13)   | <b>4.3% (1)</b>   | 36.7% (11)   | -                 |
| <i>let-418(n3536)</i> + LET-418 in germline                          | 100.0% (21)             | -                  | 100.0% (21)  | -                  | 100.0% (33)  | -                 | 90.9% (20)   | -                 |
| <i>let-418(n3536)</i> + LET-418 in hypodermis and germline           | 96.9% (31)              | <b>3.1% (1)</b>    | 75.0% (15)   | <b>25.0% (5)</b>   | 50.0% (10)   | <b>5.0% (1)</b>   | 23.8% (5)    | -                 |

# Supplemental Table S10

| Average number of HLH-8::GFP positive cells                 |                                               |                        |                        |                       |
|-------------------------------------------------------------|-----------------------------------------------|------------------------|------------------------|-----------------------|
| Strains                                                     | Hours after birth (hrs); number of worms (n=) |                        |                        |                       |
|                                                             | 22 hrs (n=)                                   | 30 hrs (n=)            | 45 hrs (n=)            | 55 hrs (n=)           |
| wild type                                                   | <b>16.3 ± 1.2 (20)</b>                        | <b>18.0 ± 0.0 (23)</b> | <b>16.0 ± 0.0 (20)</b> | 1.3 ± 1.4 (21)        |
| <i>let-418(n3536)</i>                                       | 1.1 ± 0.3 (21)                                | 1.1 ± 0.3 (21)         | 1.1 ± 0.3 (23)         | 1.1 ± 0.3 (22)        |
| <i>let-418(n3536)</i> + LET-418 in hypodermis               | 1.2 ± 0.4 (22)                                | <b>2.2 ± 2.0 (25)</b>  | 0.8 ± 1.1 (49)         | 0.4 ± 0.8 (37)        |
| <i>let-418(n3536)</i> + LET-418 in M cell                   | 1.2 ± 0.4 (33)                                | 1.4 ± 0.5 (30)         | 1.2 ± 0.4 (21)         | 1.2 ± 0.5 (30)        |
| <i>let-418(n3536)</i> + LET-418 in hypodermis and M cell    | 1.9 ± 1.0 (29)                                | <b>9.7 ± 4.4 (21)</b>  | <b>3.8 ± 2.3 (24)</b>  | <b>4.0 ± 2.2 (21)</b> |
| <i>let-418(n3536)</i> + LET-418 in intestine                | 1.1 ± 0.3 (30)                                | <b>2.4 ± 1.8 (37)</b>  | 1.4 ± 1.8 (34)         | 0.6 ± 0.9 (43)        |
| <i>let-418(n3536)</i> + LET-418 in hypodermis and intestine | 1.2 ± 0.4 (29)                                | <b>2.6 ± 1.2 (21)</b>  | 1.3 ± 1.7 (38)         | 0.8 ± 1.3 (20)        |
| <i>let-418(n3536)</i> + LET-418 in muscles                  | 1.1 ± 0.3 (22)                                | 1.1 ± 0.3 (35)         | 1.0 ± 0.2 (30)         | 1.0 ± 0.4 (24)        |
| <i>let-418(n3536)</i> + LET-418 in hypodermis and muscles   | 1.3 ± 0.9 (37)                                | <b>2.3 ± 1.1 (21)</b>  | 0.7 ± 0.8 (42)         | 0.5 ± 1.0 (20)        |
| <i>let-418(n3536)</i> + LET-418 in neurons                  | 1.1 ± 0.3 (27)                                | 1.0 ± 0.2 (22)         | 1.0 ± 0.2 (21)         | 1.0 ± 0.5 (21)        |
| <i>let-418(n3536)</i> + LET-418 in hypodermis and neurons   | 1.3 ± 0.4 (24)                                | 1.9 ± 1.3 (25)         | 1.0 ± 1.0 (23)         | 0.4 ± 0.6 (30)        |
| <i>let-418(n3536)</i> + LET-418 in germline                 | 1.1 ± 0.3 (21)                                | 1.1 ± 0.3 (21)         | 1.1 ± 0.3 (33)         | 1.1 ± 0.5 (22)        |
| <i>let-418(n3536)</i> + LET-418 in hypodermis and germline  | 1.4 ± 0.6 (32)                                | 1.9 ± 1.2 (20)         | 0.8 ± 0.8 (20)         | 0.2 ± 0.4 (21)        |

**Bold: p values <0.05**

## Supplemental Figure S4

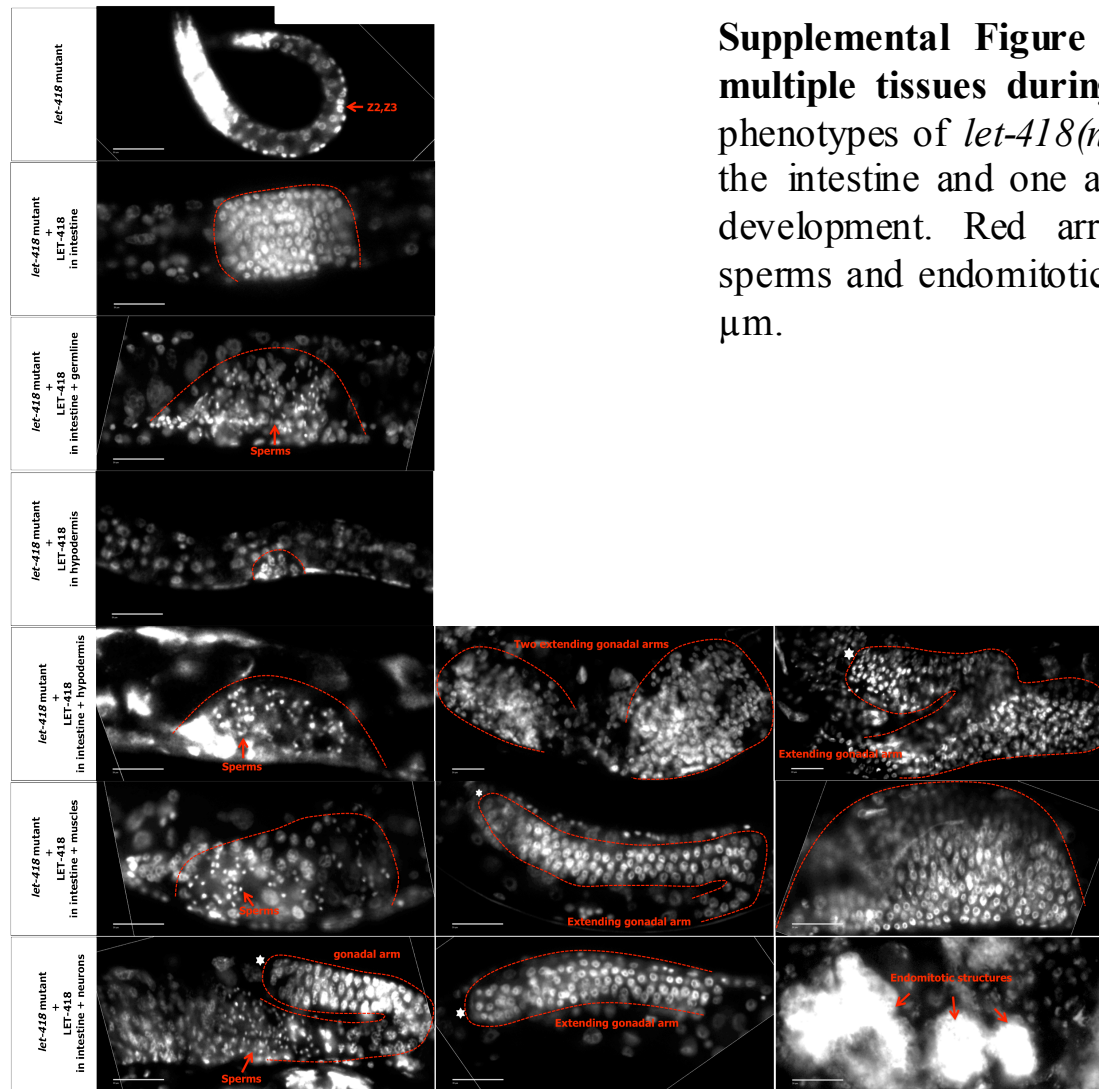

**Supplemental Figure S4. LET-418/Mi-2 is required in multiple tissues during germline development.** Germline phenotypes of *let-418(n3536)* animals expressing *let-418* in the intestine and one additional tissue at terminal stage of development. Red arrows are pointing towards Z2/Z3, sperms and endomitotic oocytes as indicated. Scale bar: 20  $\mu$ m.



# Supplemental Table S11

| Percentage of worms with sperms |                       |                                                |                                              |                                             |                                                           |                                               |                                                             |                                            |                                                          |                                            |                                                          |
|---------------------------------|-----------------------|------------------------------------------------|----------------------------------------------|---------------------------------------------|-----------------------------------------------------------|-----------------------------------------------|-------------------------------------------------------------|--------------------------------------------|----------------------------------------------------------|--------------------------------------------|----------------------------------------------------------|
| Hours after birth (hrs)         | Strains               |                                                |                                              |                                             |                                                           |                                               |                                                             |                                            |                                                          |                                            |                                                          |
|                                 | <i>let-418(n3536)</i> | <i>let-418(n3536)</i> + LET-418 in all tissues | <i>let-418(n3536)</i> + LET-418 in intestine | <i>let-418(n3536)</i> + LET-418 in germline | <i>let-418(n3536)</i> + LET-418 in intestine and germline | <i>let-418(n3536)</i> + LET-418 in hypodermis | <i>let-418(n3536)</i> + LET-418 in intestine and hypodermis | <i>let-418(n3536)</i> + LET-418 in muscles | <i>let-418(n3536)</i> + LET-418 in intestine and muscles | <i>let-418(n3536)</i> + LET-418 in neurons | <i>let-418(n3536)</i> + LET-418 in intestine and neurons |
| 22 hrs                          |                       |                                                |                                              |                                             |                                                           |                                               |                                                             |                                            |                                                          |                                            |                                                          |
| worms with sperms               | -                     | -                                              | -                                            | -                                           | -                                                         | -                                             | -                                                           | -                                          | -                                                        | -                                          | -                                                        |
| worms without sperms            | 100% (15)             | 100% (11)                                      | 100% (20)                                    | 100% (20)                                   | 100% (23)                                                 | 100% (40)                                     | 100% (21)                                                   | 100% (22)                                  | 100% (21)                                                | 100% (21)                                  | 100% (21)                                                |
| 30 hrs                          |                       |                                                |                                              |                                             |                                                           |                                               |                                                             |                                            |                                                          |                                            |                                                          |
| worms with sperms               | -                     | -                                              | -                                            | -                                           | -                                                         | -                                             | -                                                           | -                                          | -                                                        | -                                          | -                                                        |
| worms without sperms            | 100% (17)             | 100% (13)                                      | 100% (20)                                    | 100% (20)                                   | 100% (21)                                                 | 100% (27)                                     | 100% (23)                                                   | 100% (23)                                  | 100% (21)                                                | 100% (22)                                  | 100% (23)                                                |
| 45 hrs                          |                       |                                                |                                              |                                             |                                                           |                                               |                                                             |                                            |                                                          |                                            |                                                          |
| worms with sperms               | -                     | -                                              | -                                            | -                                           | -                                                         | -                                             | -                                                           | -                                          | -                                                        | -                                          | -                                                        |
| worms without sperms            | 100% (11)             | 100% (15)                                      | 100% (28)                                    | 100% (21)                                   | 100% (29)                                                 | 100% (41)                                     | 100% (22)                                                   | 100% (22)                                  | 100% (30)                                                | 100% (20)                                  | 100% (25)                                                |
| 55 hrs                          |                       |                                                |                                              |                                             |                                                           |                                               |                                                             |                                            |                                                          |                                            |                                                          |
| worms with sperms               | -                     | <b>100% (5)</b>                                | -                                            | -                                           | -                                                         | -                                             | -                                                           | -                                          | -                                                        | -                                          | -                                                        |
| worms without sperms            | 100% (14)             | -                                              | 100% (20)                                    | 100% (23)                                   | 100% (22)                                                 | 100% (20)                                     | 100% (20)                                                   | 100% (20)                                  | 100% (20)                                                | 100% (21)                                  | 100% (36)                                                |
| 75 hrs                          |                       |                                                |                                              |                                             |                                                           |                                               |                                                             |                                            |                                                          |                                            |                                                          |
| worms with sperms               |                       | <b>100% (10)</b>                               | <b>11% (4)</b>                               |                                             | <b>55% (11)</b>                                           | -                                             | <b>45% (9)</b>                                              |                                            | <b>30% (6)</b>                                           |                                            | <b>19% (6)</b>                                           |
| worms without sperms            |                       | -                                              | 89% (32)                                     |                                             | 45% (9)                                                   | 100% (37)                                     | 55% (11)                                                    |                                            | 70% (14)                                                 |                                            | 81% (25)                                                 |
| 100 hrs                         |                       |                                                |                                              |                                             |                                                           |                                               |                                                             |                                            |                                                          |                                            |                                                          |
| worms with sperms               |                       | <b>37.5% (3)</b>                               | <b>15% (3)</b>                               |                                             | <b>45% (9)</b>                                            | -                                             | <b>48% (10)</b>                                             |                                            | <b>19% (5)</b>                                           |                                            | <b>13% (4)</b>                                           |
| worms without sperms            |                       | 62.5% (5)                                      | 85% (17)                                     |                                             | 55% (11)                                                  | 100% (36)                                     | 52% (11)                                                    |                                            | 81% (21)                                                 |                                            | 87% (26)                                                 |
| 124 hrs                         |                       |                                                |                                              |                                             |                                                           |                                               |                                                             |                                            |                                                          |                                            |                                                          |
| worms with sperms               |                       | -                                              | <b>15% (4)</b>                               |                                             | <b>42% (11)</b>                                           | -                                             | <b>40% (8)</b>                                              |                                            | <b>27% (6)</b>                                           |                                            | <b>24% (5)</b>                                           |
| worms without sperms            |                       | 100% (9)                                       | 85% (23)                                     |                                             | 58% (15)                                                  | 100% (26)                                     | 60% (12)                                                    |                                            | 73% (16)                                                 |                                            | 76% (16)                                                 |
| 148 hrs                         |                       |                                                |                                              |                                             |                                                           |                                               |                                                             |                                            |                                                          |                                            |                                                          |
| worms with sperms               |                       | -                                              | <b>5% (1)</b>                                |                                             | <b>43% (9)</b>                                            | -                                             | <b>40% (8)</b>                                              |                                            | <b>25% (5)</b>                                           |                                            | <b>25% (5)</b>                                           |
| worms without sperms            |                       | 100% (5)                                       | 95% (19)                                     |                                             | 57% (12)                                                  | 100% (20)                                     | 60% (12)                                                    |                                            | 75% (15)                                                 |                                            | 75% (15)                                                 |

# Supplemental Table S12

| Average number of germ cells |                       |                                                |                                              |                                             |                                                           |                                               |                                                             |                                            |                                                          |                                            |                                                          |
|------------------------------|-----------------------|------------------------------------------------|----------------------------------------------|---------------------------------------------|-----------------------------------------------------------|-----------------------------------------------|-------------------------------------------------------------|--------------------------------------------|----------------------------------------------------------|--------------------------------------------|----------------------------------------------------------|
| Hours after birth (hrs)      | Strains               |                                                |                                              |                                             |                                                           |                                               |                                                             |                                            |                                                          |                                            |                                                          |
|                              | <i>let-418(n3536)</i> | <i>let-418(n3536)</i> + LET-418 in all tissues | <i>let-418(n3536)</i> + LET-418 in intestine | <i>let-418(n3536)</i> + LET-418 in germline | <i>let-418(n3536)</i> + LET-418 in intestine and germline | <i>let-418(n3536)</i> + LET-418 in hypodermis | <i>let-418(n3536)</i> + LET-418 in intestine and hypodermis | <i>let-418(n3536)</i> + LET-418 in muscles | <i>let-418(n3536)</i> + LET-418 in intestine and muscles | <i>let-418(n3536)</i> + LET-418 in neurons | <i>let-418(n3536)</i> + LET-418 in intestine and neurons |
| 22 hrs                       |                       |                                                |                                              |                                             |                                                           |                                               |                                                             |                                            |                                                          |                                            |                                                          |
| undifferentiated germ cells  | 2.1 ± 0.2 (15)        | <b>17.1 ± 1.3 (11)</b>                         | <b>14.0 ± 3.0 (20)</b>                       | 2.1 ± 0.2 (20)                              | <b>14.5 ± 2.1 (23)</b>                                    | <b>3.3 ± 1.0 (40)</b>                         | <b>11.3 ± 2.1 (21)</b>                                      | 2.1 ± 0.3 (22)                             | <b>12.0 ± 3.0 (21)</b>                                   | 2.0 ± 0.2 (21)                             | <b>14.2 ± 2.4 (21)</b>                                   |
| 30 hrs                       |                       |                                                |                                              |                                             |                                                           |                                               |                                                             |                                            |                                                          |                                            |                                                          |
| undifferentiated germ cells  | 2.1 ± 0.2 (17)        | <b>55.5 ± 2.3 (13)</b>                         | <b>27.1 ± 3.8 (20)</b>                       | 2.0 ± 0.0 (20)                              | <b>29.0 ± 3.1 (21)</b>                                    | <b>5.0 ± 1.2 (27)</b>                         | <b>26.3 ± 3.9 (23)</b>                                      | 2.1 ± 0.3 (23)                             | <b>25.0 ± 4.0 (21)</b>                                   | 2.0 ± 0.2 (22)                             | <b>26.9 ± 3.9 (23)</b>                                   |
| 45 hrs                       |                       |                                                |                                              |                                             |                                                           |                                               |                                                             |                                            |                                                          |                                            |                                                          |
| undifferentiated germ cells  | 2.1 ± 0.3 (11)        | <b>443.2 ± 8.3 (15)</b>                        | <b>55.4 ± 11.8 (28)</b>                      | 2.0 ± 0.2 (21)                              | <b>57.0 ± 10.2 (29)</b>                                   | <b>7.1 ± 1.4 (41)</b>                         | <b>51.5 ± 5.7 (22)</b>                                      | 2.1 ± 0.3 (22)                             | <b>53.4 ± 13.7 (30)</b>                                  | 2.1 ± 0.3 (20)                             | <b>59.0 ± 8.8 (25)</b>                                   |
| 55 hrs                       |                       |                                                |                                              |                                             |                                                           |                                               |                                                             |                                            |                                                          |                                            |                                                          |
| undifferentiated germ cells  | 2.1 ± 0.3 (14)        | <b>864.2 ± 9.2 (5)</b>                         | <b>79.5 ± 26.4 (20)</b>                      | 2.0 ± 0.2 (23)                              | <b>71.2 ± 11.3 (22)</b>                                   | <b>7.2 ± 1.0 (20)</b>                         | <b>78.0 ± 22.7 (20)</b>                                     | 2.1 ± 0.3 (20)                             | <b>73.7 ± 16.0 (20)</b>                                  | 2.1 ± 0.3 (21)                             | <b>101.1 ± 21.6 (36)</b>                                 |
| sperms                       | -                     | 268.4 ± 5.9 (5)                                | -                                            | -                                           | -                                                         | -                                             | -                                                           | -                                          | -                                                        | -                                          | -                                                        |
| oocytes                      | -                     | 9.8 ± 1.8 (5)                                  | -                                            | -                                           | -                                                         | -                                             | -                                                           | -                                          | -                                                        | -                                          | -                                                        |
| Total number of germ cells   | 2.1 (14)              | 1142.4 (5)                                     | 79.5 (20)                                    | 2.0 (23)                                    | 71.2 (22)                                                 | 7.2 (20)                                      | 78.0 (20)                                                   | 2.1 (20)                                   | 73.7 (20)                                                | 2.1 (21)                                   | 101.1 (36)                                               |
| 75 hrs                       |                       |                                                |                                              |                                             |                                                           |                                               |                                                             |                                            |                                                          |                                            |                                                          |
| undifferentiated germ cells  |                       | <b>1195.4 ± 17.1 (10)</b>                      | <b>93.6 ± 34 (36)</b>                        |                                             | <b>78.4 ± 34.7 (20)</b>                                   | <b>7.7 ± 2.1 (37)</b>                         | <b>80.9 ± 24.0 (20)</b>                                     |                                            | <b>84.3 ± 36.4 (20)</b>                                  |                                            | <b>125.8 ± 67.7 (31)</b>                                 |
| sperms                       |                       | 32.6 ± 6.5 (10)                                | 1.8 ± 6.0 (36)                               |                                             | 17.9 ± 22.0 (20)                                          | -                                             | 20.4 ± 31.9 (20)                                            |                                            | 17.6 ± 28.3 (20)                                         |                                            | 12.3 ± 35.4 (31)                                         |
| oocytes                      |                       | 19.3 ± 2.5 (10)                                | -                                            |                                             | -                                                         | -                                             | -                                                           |                                            | -                                                        |                                            | -                                                        |
| Total number of germ cells   |                       | 1247.3 (10)                                    | 95.4 (36)                                    |                                             | 96.3 (20)                                                 | 7.7 (37)                                      | 101.3 (20)                                                  |                                            | 101.9 (20)                                               |                                            | 138.1 (31)                                               |
| 100 hrs                      |                       |                                                |                                              |                                             |                                                           |                                               |                                                             |                                            |                                                          |                                            |                                                          |
| undifferentiated germ cells  |                       | <b>1058.1 ± 21.6 (8)</b>                       | <b>104.7 ± 25.8 (20)</b>                     |                                             | <b>111.85 ± 26.9 (20)</b>                                 | <b>8.7 ± 2.2 (36)</b>                         | <b>102.8 ± 69.6 (21)</b>                                    |                                            | <b>96.9 ± 34.1 (26)</b>                                  |                                            | <b>129.8 ± 58.4 (30)</b>                                 |
| sperms                       |                       | 2.0 ± 2.6 (8)                                  | 1.4 ± 3.8 (20)                               |                                             | 18.05 ± 27.7 (20)                                         | -                                             | 21.1 ± 25.1 (21)                                            |                                            | 13.3 ± 28.8 (26)                                         |                                            | 12.8 ± 35.9 (30)                                         |
| oocytes                      |                       | 28.8 ± 6.1 (8)                                 | -                                            |                                             | -                                                         | -                                             | -                                                           |                                            | -                                                        |                                            | -                                                        |
| Total number of germ cells   |                       | 1088.9 (8)                                     | 106.1 (20)                                   |                                             | 129.9 (20)                                                | 8.7 (36)                                      | 123.9 (21)                                                  |                                            | 110.2 (26)                                               |                                            | 142.6 (30)                                               |
| 124 hrs                      |                       |                                                |                                              |                                             |                                                           |                                               |                                                             |                                            |                                                          |                                            |                                                          |
| undifferentiated germ cells  |                       | <b>1024.2 ± 24.2 (9)</b>                       | <b>123.6 ± 39.8 (27)</b>                     |                                             | <b>95.15 ± 36.5 (26)</b>                                  | <b>10.0 ± 2.6 (26)</b>                        | <b>105.0 ± 52.6 (20)</b>                                    |                                            | <b>102.4 ± 25.3 (22)</b>                                 |                                            | <b>145.7 ± 41.5 (21)</b>                                 |
| sperms                       |                       | -                                              | 1.0 ± 2.5 (27)                               |                                             | 17.08 ± 26.9 (26)                                         | -                                             | 27.9 ± 39.7 (20)                                            |                                            | 12.0 ± 20.3 (22)                                         |                                            | 11.9 ± 22.7 (21)                                         |
| oocytes                      |                       | 32.6 ± 8.4 (9)                                 | -                                            |                                             | -                                                         | -                                             | -                                                           |                                            | -                                                        |                                            | -                                                        |
| Total number of germ cells   |                       | 1056.8 (9)                                     | 124.6 (27)                                   |                                             | 112.2 (26)                                                | 10.0 (26)                                     | 132.9 (20)                                                  |                                            | 114.4 (22)                                               |                                            | 157.6 (21)                                               |
| 148 hrs                      |                       |                                                |                                              |                                             |                                                           |                                               |                                                             |                                            |                                                          |                                            |                                                          |
| undifferentiated germ cells  |                       | <b>928.0 ± 25.2 (5)</b>                        | <b>95.0 ± 25.1 (20)</b>                      |                                             | <b>93.3 ± 23.0 (21)</b>                                   | <b>12.5 ± 2.2 (20)</b>                        | <b>110.1 ± 52.7 (20)</b>                                    |                                            | <b>115.0 ± 65.9 (20)</b>                                 |                                            | <b>175.75 ± 86.4 (20)</b>                                |
| sperms                       |                       | -                                              | 0.2 ± 0.7 (20)                               |                                             | 12.5 ± 18.3 (21)                                          | -                                             | 21.2 ± 35.7 (20)                                            |                                            | 11.8 ± 23.2 (20)                                         |                                            | 12.35 ± 23.0 (20)                                        |
| oocytes                      |                       | 26.8 ± 6.6 (5)                                 | -                                            |                                             | -                                                         | -                                             | -                                                           |                                            | -                                                        |                                            | -                                                        |
| Total number of germ cells   |                       | 954.8 (5)                                      | 95.1 (20)                                    |                                             | 105.8 (21)                                                | 12.5 (20)                                     | 131.3 (20)                                                  |                                            | 126.8 (20)                                               |                                            | 188.1 (20)                                               |

**Bold: p values <0.05**

# Supplemental Table S13

| Hours after birth (hrs)     | Average number of germ cells |                                                |                                               |                                             |                                                            |                                              |                                                             |                                            |                                                           |                                            |                                                           |
|-----------------------------|------------------------------|------------------------------------------------|-----------------------------------------------|---------------------------------------------|------------------------------------------------------------|----------------------------------------------|-------------------------------------------------------------|--------------------------------------------|-----------------------------------------------------------|--------------------------------------------|-----------------------------------------------------------|
|                             | Strains                      |                                                |                                               |                                             |                                                            |                                              |                                                             |                                            |                                                           |                                            |                                                           |
|                             | <i>let-418(n3536)</i>        | <i>let-418(n3536)</i> + LET-418 in all tissues | <i>let-418(n3536)</i> + LET-418 in hypodermis | <i>let-418(n3536)</i> + LET-418 in germline | <i>let-418(n3536)</i> + LET-418 in hypodermis and germline | <i>let-418(n3536)</i> + LET-418 in intestine | <i>let-418(n3536)</i> + LET-418 in hypodermis and intestine | <i>let-418(n3536)</i> + LET-418 in muscles | <i>let-418(n3536)</i> + LET-418 in hypodermis and muscles | <i>let-418(n3536)</i> + LET-418 in neurons | <i>let-418(n3536)</i> + LET-418 in hypodermis and neurons |
| 22 hrs                      |                              |                                                |                                               |                                             |                                                            |                                              |                                                             |                                            |                                                           |                                            |                                                           |
| undifferentiated germ cells | 2.1 ± 0.2 (15)               | <b>17.1 ± 1.3 (11)</b>                         | <b>3.3 ± 1.0 (40)</b>                         | 2.1 ± 0.2 (20)                              | <b>3.7 ± 1.1 (23)</b>                                      | <b>14.0 ± 3.0 (20)</b>                       | <b>11.3 ± 2.1 (21)</b>                                      | 2.1 ± 0.3 (22)                             | <b>3.8 ± 0.9 (20)</b>                                     | 2.0 ± 0.2 (21)                             | <b>3.9 ± 1.1 (23)</b>                                     |
| 30 hrs                      |                              |                                                |                                               |                                             |                                                            |                                              |                                                             |                                            |                                                           |                                            |                                                           |
| undifferentiated germ cells | 2.1 ± 0.2 (17)               | <b>55.5 ± 2.3 (13)</b>                         | <b>5.0 ± 1.2 (27)</b>                         | 2.0 ± 0.0 (20)                              | <b>5.3 ± 1.7 (21)</b>                                      | <b>27.1 ± 3.8 (20)</b>                       | <b>26.3 ± 3.9 (23)</b>                                      | 2.1 ± 0.3 (23)                             | <b>5.7 ± 1.2 (21)</b>                                     | 2.0 ± 0.2 (22)                             | <b>5.2 ± 1.6 (21)</b>                                     |
| 45 hrs                      |                              |                                                |                                               |                                             |                                                            |                                              |                                                             |                                            |                                                           |                                            |                                                           |
| undifferentiated germ cells | 2.1 ± 0.3 (11)               | <b>443.2 ± 8.3 (15)</b>                        | <b>7.1 ± 1.4 (41)</b>                         | 2.0 ± 0.2 (21)                              | <b>7.2 ± 1.4 (23)</b>                                      | <b>55.4 ± 11.8 (28)</b>                      | <b>51.5 ± 5.7 (22)</b>                                      | 2.1 ± 0.3 (22)                             | <b>6.5 ± 1.7 (21)</b>                                     | 2.1 ± 0.3 (20)                             | <b>7.3 ± 1.4 (22)</b>                                     |
| 55 hrs                      |                              |                                                |                                               |                                             |                                                            |                                              |                                                             |                                            |                                                           |                                            |                                                           |
| undifferentiated germ cells | 2.1 ± 0.3 (14)               | <b>864.2 ± 9.2 (5)</b>                         | <b>7.2 ± 1.0 (20)</b>                         | 2.0 ± 0.2 (23)                              | <b>7.6 ± 1.3 (23)</b>                                      | <b>79.5 ± 26.4 (20)</b>                      | <b>78.0 ± 22.7 (20)</b>                                     | 2.1 ± 0.3 (20)                             | <b>7.3 ± 1.0 (21)</b>                                     | 2.1 ± 0.3 (21)                             | <b>7.4 ± 1.7 (20)</b>                                     |
| sperms                      | -                            | 268.4 ± 5.9 (5)                                | -                                             | -                                           | -                                                          | -                                            | -                                                           | -                                          | -                                                         | -                                          | -                                                         |
| oocytes                     | -                            | 9.8 ± 1.8 (5)                                  | -                                             | -                                           | -                                                          | -                                            | -                                                           | -                                          | -                                                         | -                                          | -                                                         |
| Total number of germ cells  | 2.1 (14)                     | 1142.4 (5)                                     | 7.2 (20)                                      | 2.0 (23)                                    | 7.6 (23)                                                   | 79.5 (20)                                    | 78.0 (20)                                                   | 2.1 (20)                                   | 7.3 (21)                                                  | 2.1 (21)                                   | 7.4 (20)                                                  |
| 75 hrs                      |                              |                                                |                                               |                                             |                                                            |                                              |                                                             |                                            |                                                           |                                            |                                                           |
| undifferentiated germ cells |                              | <b>1195.4 ± 17.1 (10)</b>                      | <b>7.7 ± 2.1 (37)</b>                         |                                             | <b>7.9 ± 1.8 (21)</b>                                      | <b>93.6 ± 34.0 (36)</b>                      | <b>80.9 ± 24.0 (20)</b>                                     |                                            | <b>8.2 ± 2.2 (21)</b>                                     |                                            | <b>7.8 ± 1.9 (22)</b>                                     |
| sperms                      |                              | 32.6 ± 6.5 (10)                                | -                                             |                                             | -                                                          | 1.8 ± 6.0 (36)                               | 20.4 ± 31.9 (20)                                            |                                            | -                                                         |                                            | -                                                         |
| oocytes                     |                              | 19.3 ± 2.5 (10)                                | -                                             |                                             | -                                                          | -                                            | -                                                           |                                            | -                                                         |                                            | -                                                         |
| Total number of germ cells  |                              | 1247.3 (10)                                    | 7.7 (37)                                      |                                             | 7.9 (21)                                                   | 95.4 (36)                                    | 101.3 (20)                                                  |                                            | 8.2 (21)                                                  |                                            | 7.8 (22)                                                  |
| 100 hrs                     |                              |                                                |                                               |                                             |                                                            |                                              |                                                             |                                            |                                                           |                                            |                                                           |
| undifferentiated germ cells |                              | <b>1058.1 ± 21.6 (8)</b>                       | <b>8.7 ± 2.2 (36)</b>                         |                                             | <b>9.5 ± 2.6 (24)</b>                                      | <b>104.7 ± 25.8 (20)</b>                     | <b>102.8 ± 69.6 (21)</b>                                    |                                            | <b>9.8 ± 1.9 (21)</b>                                     |                                            | <b>9.3 ± 2.4 (22)</b>                                     |
| sperms                      |                              | 2.0 ± 2.6 (8)                                  | -                                             |                                             | -                                                          | 1.4 ± 3.8 (20)                               | 21.1 ± 25.1 (21)                                            |                                            | -                                                         |                                            | -                                                         |
| oocytes                     |                              | 28.8 ± 6.1 (8)                                 | -                                             |                                             | -                                                          | -                                            | -                                                           |                                            | -                                                         |                                            | -                                                         |
| Total number of germ cells  |                              | 1088.9 (8)                                     | 8.7 (36)                                      |                                             | 9.5 (24)                                                   | 106.1 (20)                                   | 123.9 (21)                                                  |                                            | 9.8 (21)                                                  |                                            | 9.3 (22)                                                  |
| 124 hrs                     |                              |                                                |                                               |                                             |                                                            |                                              |                                                             |                                            |                                                           |                                            |                                                           |
| undifferentiated germ cells |                              | <b>1024.2 ± 24.2 (9)</b>                       | <b>10.0 ± 2.6 (26)</b>                        |                                             | <b>9.8 ± 2.6 (25)</b>                                      | <b>123.6 ± 39.8 (27)</b>                     | <b>105.0 ± 52.6 (20)</b>                                    |                                            | <b>10.1 ± 3.0 (20)</b>                                    |                                            | <b>10.0 ± 2.5 (21)</b>                                    |
| sperms                      |                              | -                                              | -                                             |                                             | -                                                          | 1.0 ± 2.5 (27)                               | 27.9 ± 39.7 (20)                                            |                                            | -                                                         |                                            | -                                                         |
| oocytes                     |                              | 32.6 ± 8.4 (9)                                 | -                                             |                                             | -                                                          | -                                            | -                                                           |                                            | -                                                         |                                            | -                                                         |
| Total number of germ cells  |                              | 1056.8 (9)                                     | 10.0 (26)                                     |                                             | 9.8 (25)                                                   | 124.6 (27)                                   | 132.9 (20)                                                  |                                            | 10.1 (20)                                                 |                                            | 10.0 (21)                                                 |
| 148 hrs                     |                              |                                                |                                               |                                             |                                                            |                                              |                                                             |                                            |                                                           |                                            |                                                           |
| undifferentiated germ cells |                              | <b>928.0 ± 25.2 (5)</b>                        | <b>12.5 ± 2.2 (20)</b>                        |                                             | <b>11.6 ± 2.9 (21)</b>                                     | <b>95.0 ± 25.1 (20)</b>                      | <b>110.1 ± 52.7 (20)</b>                                    |                                            | <b>12.3 ± 2.8 (20)</b>                                    |                                            | <b>11.9 ± 2.3 (20)</b>                                    |
| sperms                      |                              | -                                              | -                                             |                                             | -                                                          | 0.2 ± 0.7 (20)                               | 21.2 ± 35.7 (20)                                            |                                            | -                                                         |                                            | -                                                         |
| oocytes                     |                              | 26.8 ± 6.6 (5)                                 | -                                             |                                             | -                                                          | -                                            | -                                                           |                                            | -                                                         |                                            | -                                                         |
| Total number of germ cells  |                              | 954.8 (5)                                      | 12.5 (20)                                     |                                             | 11.6 (21)                                                  | 95.1 (20)                                    | 131.3 (20)                                                  |                                            | 12.3 (20)                                                 |                                            | 11.9 (20)                                                 |

**Bold: p values <0.05**

## Supplemental Figure S5

**Supplemental Figure S5. Insulin signaling is required for the cell-nonautonomous function of LET-418 on M cell division.** Representative pictures are shown for the indicated genetic background. Undifferentiated cell descendant of the M lineage were visualized using *hlh-8::gfp* reporter in 22, 30, 45 and 55 hours after birth. During postembryonic development of wild type worms, M mesoblast undergoes a series of divisions giving rise to BWMs, CCs and sex muscles. Scale bar: 20  $\mu$ m.

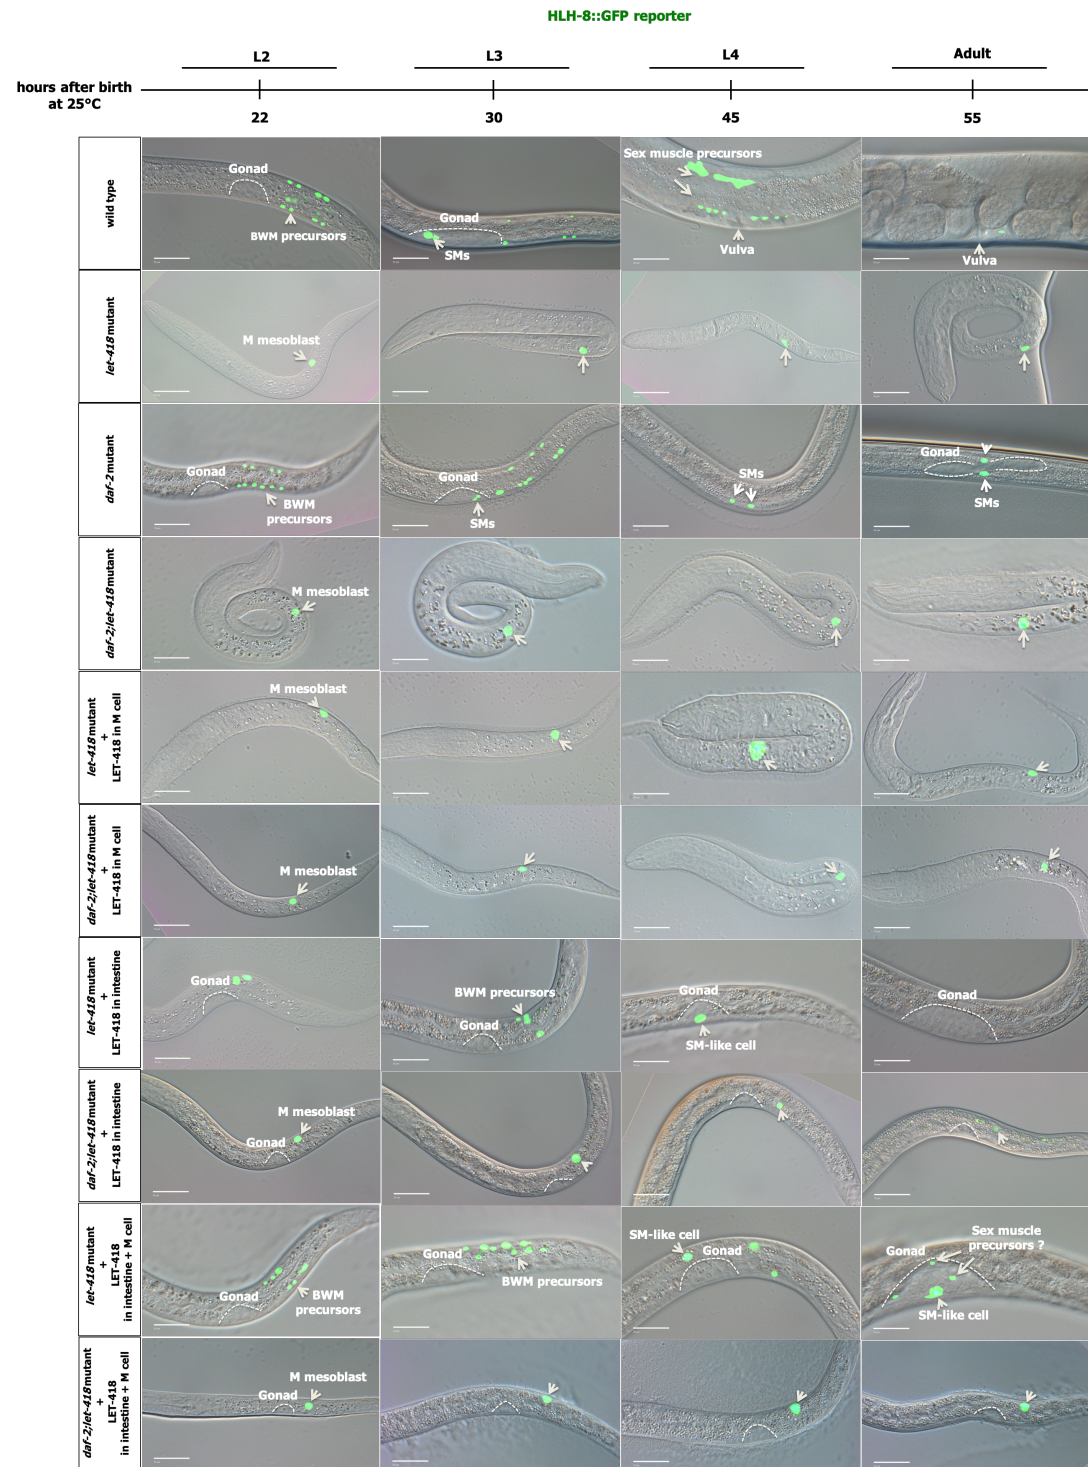



Supplemental Table S14

| Percentage of worms exhibiting 1-2 or more HLH-8::GFP positive cells |                         |                    |              |                    |              |                   |              |                   |
|----------------------------------------------------------------------|-------------------------|--------------------|--------------|--------------------|--------------|-------------------|--------------|-------------------|
| Strains                                                              | Hours after birth (hrs) |                    |              |                    |              |                   |              |                   |
|                                                                      | 22 hrs                  |                    | 30 hrs       |                    | 45 hrs       |                   | 55 hrs       |                   |
|                                                                      | 1 or 2 cells            | >2 cells           | 1 or 2 cells | >2 cells           | 1 or 2 cells | >2 cells          | 1 or 2 cells | >2 cells          |
| wild type                                                            | -                       | <b>100.0% (20)</b> | -            | <b>100.0% (23)</b> | -            | <b>100% (20)</b>  | 33.3% (7)    | <b>19.0% (4)</b>  |
| <i>let-418(n3536)</i>                                                | 100.0% (21)             | -                  | 100.0% (21)  | -                  | 100.0% (23)  | -                 | 100.0% (22)  | -                 |
| <i>daf-2(e1370)</i>                                                  | -                       | <b>100.0% (22)</b> | -            | <b>100% (21)</b>   | 95.2% (20)   | <b>4.8% (1)</b>   | 81.0% (17)   | <b>19.0% (4)</b>  |
| <i>daf-2(e1370);let-418(n3536)</i>                                   | 100.0% (23)             | -                  | 100.0% (25)  | -                  | 100.0% (21)  | -                 | 100.0% (20)  | -                 |
| <i>let-418(n3536)</i> + LET-418 in intestine                         | 100.0% (30)             | -                  | 67.6% (25)   | <b>32.4% (12)</b>  | 58.8% (20)   | <b>11.8% (4)</b>  | 32.6%(14)    | <b>4.7% (2)</b>   |
| <i>daf-2(e1370);let-418(n3536)</i> + LET-418 in intestine            | 100.0% (38)             | -                  | 100.0% (21)  | -                  | 92.0% (23)   | -                 | 61.9% (13)   | -                 |
| <i>let-418(n3536)</i> + LET-418 in M cell                            | 100.0% (33)             | -                  | 100.0% (30)  | -                  | 100.0% (21)  | -                 | 93.3% (28)   | -                 |
| <i>daf-2(e1370);let-418(n3536)</i> + LET-418 in M cell               | 100.0% (20)             | -                  | 100.0% (22)  | -                  | 100.0% (25)  | -                 | 95.7% (22)   | -                 |
| <i>let-418(n3536)</i> + LET-418 in intestine and M cell              | 73.3% (22)              | <b>26.7% (8)</b>   | 21.7% (5)    | <b>78.3% (18)</b>  | 22.7% (5)    | <b>77.3% (17)</b> | 4.8% (1)     | <b>95.2% (20)</b> |
| <i>daf-2(e1370);let-418(n3536)</i> + LET-418 in intestine and M cell | 100.0% (27)             | -                  | 92.6% (25)   | <b>7.4% (2)</b>    | 95.2% (20)   | <b>4.8% (1)</b>   | 95.2% (20)   | -                 |

Supplemental Table S15

| Average number of HLH-8::GFP positive cells                          |                                               |                        |                        |                       |
|----------------------------------------------------------------------|-----------------------------------------------|------------------------|------------------------|-----------------------|
| Strains                                                              | Hours after birth (hrs); number of worms (n=) |                        |                        |                       |
|                                                                      | 22 hrs (n=)                                   | 30 hrs (n=)            | 45 hrs (n=)            | 55 hrs (n=)           |
| wild type                                                            | <b>16.3 ± 1.2 (20)</b>                        | <b>18.0 ± 0.0 (23)</b> | <b>16.0 ± 0.0 (20)</b> | 1.3 ± 1.4 (21)        |
| <i>let-418(n3536)</i>                                                | 1.1 ± 0.3 (21)                                | 1.1 ± 0.3 (21)         | 1.1 ± 0.3 (23)         | 1.1 ± 0.3 (22)        |
| <i>daf-2(e1370)</i>                                                  | <b>11.3 ± 3.5 (22)</b>                        | <b>17.1 ± 1.2 (21)</b> | 2.0 ± 0.3 (21)         | 1.9 ± 0.7 (21)        |
| <i>daf-2(e1370);let-418(n3536)</i>                                   | 1.0 ± 0.0 (23)                                | 1.0 ± 0.0 (25)         | 1.0 ± 0.0 (21)         | 1.0 ± 0.0 (20)        |
| <i>let-418(n3536)</i> + LET-418 in intestine                         | 1.1 ± 0.3 (30)                                | <b>2.4 ± 1.8 (37)</b>  | 1.4 ± 1.8 (34)         | 0.6 ± 0.9 (43)        |
| <i>daf-2(e1370);let-418(n3536)</i> + LET-418 in intestine            | 1.0 ± 0.0 (38)                                | 1.0 ± 0.0 (21)         | 0.9 ± 0.3 (25)         | 0.6 ± 0.5 (21)        |
| <i>let-418(n3536)</i> + LET-418 in M cell                            | 1.2 ± 0.4 (33)                                | 1.4 ± 0.5 (30)         | 1.2 ± 0.4 (21)         | 1.2 ± 0.5 (30)        |
| <i>daf-2(e1370);let-418(n3536)</i> + LET-418 in M cell               | 1.0 ± 0.0 (20)                                | 1.0 ± 0.0 (22)         | 1.0 ± 0.0 (25)         | 1.0 ± 0.2 (23)        |
| <i>let-418(n3536)</i> + LET-418 in intestine and M cell              | <b>2.3 ± 1.8 (30)</b>                         | <b>9.1 ± 5.6 (23)</b>  | <b>5.8 ± 3.3 (25)</b>  | <b>5.7 ± 1.5 (21)</b> |
| <i>daf-2(e1370);let-418(n3536)</i> + LET-418 in intestine and M cell | 1.1 ± 0.3 (27)                                | 1.2 ± 0.6 (27)         | 1.2 ± 0.5 (21)         | 1.0 ± 0.4 (21)        |

**Bold: p values <0.05**
